# Supplementary material for: The Listeria monocytogenes Core-Genome Sequence Typer (LmCGST): a bioinformatic pipeline for molecular characterization with next-generation sequence data
Source: PubMed Central journal article supplement (PMC4618880; doi:10.1186/s12866-015-0526-1), 2015-10-22
Supplement: 12866_2015_526_MOESM2_ESM.pdf [file 12866_2015_526_MOESM2_ESM.pdf]

**Supporting Information for:**

The *Listeria monocytogenes* Core-Genome Sequence Typer (LmCGST): a bioinformatic pipeline for molecular characterization with next-generation sequence data

Arthur W. Pightling<sup>1</sup>, Nicholas Petronella<sup>2</sup>, Franco Pagotto<sup>1\*</sup>

<sup>1</sup> Listeriosis Reference Service for Canada, Microbiology Research Division, Bureau of Microbial Hazards, Food Directorate, Health Products and Food Branch, Health Canada, 251 Sir Frederick Banting Driveway, Ottawa, Ontario, K1A 0K9 Canada

<sup>2</sup> Biostatistics and Modelling Division, Bureau of Food Surveillance and Science Integration, Food Directorate, Health Products and Food Branch, Health Canada, 251 Sir Frederick Banting Driveway, Ottawa, Ontario, K1A 0K9 Canada

\* Corresponding author

E-mails:

Franco Pagotto: Franco.Pagotto@hc-sc.gc.ca

Arthur Pightling: Arthur.Pightling@hc-sc.gc.ca

Nicholas Petronella: Nicholas.Petronella@hc-sc.gc.ca

**Additional file 2: Sources and general features of closed chromosomes compared for calculation of pan- and core-genomes.**

| Strain       | Sero-type | Accession number | Source      | Year    | Country     | Length (Mb) | GC   | Protein | Ref  |
|--------------|-----------|------------------|-------------|---------|-------------|-------------|------|---------|------|
| 08-5578      | 1/2a      | NC_013766.2      | Clinical    | 2008    | Canada      | 3.03        | 38.0 | 3010    | [12] |
| 08-5923      | 1/2a      | NC_013768.1      | Clinical    | 2008    | Canada      | 3.00        | 38.0 | 2966    | [12] |
| 10403S       | 1/2a      | NC_017544.1      | Clinical    |         |             | 2.90        | 38.0 | 2814    | [47] |
| EGD-e        | 1/2a      | NC_022568.1      | Rabbit      | 1926    | UK          | 2.94        | 38.0 | 2848    | [48] |
| J0161        | 1/2a      | NC_017545.1      | Clinical    | 2000    | USA         | 3.00        |      | 2955    | [49] |
| La111        | 1/2a      | NC_020557.1      | Salmon      | 1996    | Denmark     | 2.78        |      | 3131    | [50] |
| N53-1        | 1/2a      | NC_020558.1      | Environment | 2002    | Denmark     | 2.78        |      | 3150    | [50] |
| SLCC5850     | 1/2a      | NC_018592.1      | Rabbit      | 1924    | UK          | 2.91        | 38.0 | 2865    | [24] |
| SLCC2755     | 1/2b      | NC_018587.1      | Chinchilla  | 1967    |             | 2.97        | 38.1 | 2877    | [24] |
| FSL-R2-561   | 1/2c      | NC_017546.1      |             |         |             | 2.97        |      | 2910    |      |
| SLCC2372     | 1/2c      | NC_018588.1      | Clinical    | 1935    | UK          | 2.97        | 38.0 | 2990    | [24] |
| Finland 1998 | 3a        | NC_017547.1      |             | 1998    | Finland     | 2.87        |      | 2762    |      |
| SLCC7179     | 3a        | NC_018593.1      | Cheese      | 1986    | Austria     | 2.88        | 38.0 | 2826    | [24] |
| SLCC2540     | 3b        | NC_018586.1      | Clinical    | 1956    | USA         | 2.98        | 37.9 | 2907    | [24] |
| SLCC2479     | 3c        | NC_018589.1      |             | 1966    |             | 2.97        | 38.0 | 2935    | [24] |
| HCC23        | 4a        | NC_011660.1      | Catfish     |         |             | 2.98        |      | 2974    | [51] |
| L99          | 4a        | NC_017529.1      | Cheese      | 1950    | Netherlands | 2.98        | 38.2 | 2925    | [52] |
| M7           | 4a        | NC_017537.1      | Milk        |         | China       | 2.98        |      | 2977    | [53] |
| 07PF0776     | 4b        | NC_017728.1      | Clinical    |         |             | 2.90        |      | 2797    | [54] |
| ATCC 19117   | 4b        | NC_018584.1      | Sheep       |         |             | 2.95        | 38.0 | 2868    | [24] |
| Clip814590   | 4b        | NC_012488.1      |             |         |             | 2.91        |      | 2766    | [52] |
| F2365        | 4b        | NC_002973.6      | Cheese      | 1985    | USA         | 2.91        | 38.0 | 2821    | [55] |
| J1816        | 4b        | NC_021829.1      |             | 2002    | USA         | 2.95        |      | 2794    | [56] |
| J1-220       | 4b        | NC_021830.1      |             | 2002    | USA         | 3.03        |      | 2985    | [56] |
| L312         | 4b        | NC_018642.1      | Cheese      |         |             | 2.91        |      | 2821    | [24] |
| LL195        | 4b        | NC_019556.1      | Clinical    | 1983-87 | Switzerland | 2.90        | 38.0 | 2838    | [57] |
| SLCC2376     | 4c        | NC_018590.1      | Poultry     |         |             | 2.84        | 38.3 | 2755    | [24] |
| SLCC2378     | 4e        | NC_018585.1      | Poultry     |         |             | 2.94        | 38.0 | 2874    | [24] |
| SLCC2482     | 7         | NC_018591.1      | Clinical    | 1966    |             | 2.94        | 38.0 | 2874    | [24] |
