# Supplementary material for: The Listeria monocytogenes Core-Genome Sequence Typer (LmCGST): a bioinformatic pipeline for molecular characterization with next-generation sequence data
Source: PubMed Central journal article supplement (PMC4618880; doi:10.1186/s12866-015-0526-1), 2015-10-22
Supplement: 12866_2015_526_MOESM4_ESM.pdf [file 12866_2015_526_MOESM4_ESM.pdf]

**Supporting Information for:**

The *Listeria monocytogenes* Core-Genome Sequence Typer (LmCGST): a bioinformatic pipeline for molecular characterization with next-generation sequence data

Arthur W. Pightling<sup>1</sup>, Nicholas Petronella<sup>2</sup>, Franco Pagotto<sup>1\*</sup>

<sup>1</sup> Listeriosis Reference Service for Canada, Microbiology Research Division, Bureau of Microbial Hazards, Food Directorate, Health Products and Food Branch, Health Canada, 251 Sir Frederick Banting Driveway, Ottawa, Ontario, K1A 0K9 Canada

<sup>2</sup> Biostatistics and Modelling Division, Bureau of Food Surveillance and Science Integration, Food Directorate, Health Products and Food Branch, Health Canada, 251 Sir Frederick Banting Driveway, Ottawa, Ontario, K1A 0K9 Canada

\* Corresponding author

E-mails:

Franco Pagotto: Franco.Pagotto@hc-sc.gc.ca

Arthur Pightling: Arthur.Pightling@hc-sc.gc.ca

Nicholas Petronella: Nicholas.Petronella@hc-sc.gc.ca

**Additional file 4: List of 1013 open-reading frames that comprise the high-confidence core genome with NCBI numbers for *Listeria monocytogenes* strain 08-5578.**

| <b>Protein name</b>              | <b>Protein sequence</b>        | <b>Gene sequence</b>                       |
|----------------------------------|--------------------------------|--------------------------------------------|
| hypothetical protein LM5578 0004 | gi 284800259 ref YP003412124.1 | gi 662858600 ref NC_013766.2 :1450-2313    |
| hypothetical protein LM5578 0005 | gi 284800260 ref YP003412125.1 | gi 662858600 ref NC_013766.2 :2310-2930    |
| hypothetical protein LM5578 0008 | gi 284800263 ref YP003412128.1 | gi 662858600 ref NC_013766.2 :4599-5867    |
| L-rhamnose isomerase             | gi 284800265 ref YP003412130.1 | gi 662858600 ref NC_013766.2 :7350-8612    |
| rhamnulose-1-phosphate aldolase  | gi 284800266 ref YP003412131.1 | gi 662858600 ref NC_013766.2 :8625-9446    |
| hypothetical protein LM5578 0013 | gi 284800268 ref YP003412133.1 | gi 662858600 ref NC_013766.2 :c11226-9814  |
| hypothetical protein LM5578 0018 | gi 284800273 ref YP003412138.1 | gi 662858600 ref NC_013766.2 :17136-18428  |
| hypothetical protein LM5578 0019 | gi 284800274 ref YP003412139.1 | gi 662858600 ref NC_013766.2 :18503-19384  |
| hypothetical protein LM5578 0020 | gi 284800275 ref YP003412140.1 | gi 662858600 ref NC_013766.2 :19371-20222  |
| hypothetical protein LM5578 0022 | gi 284800277 ref YP003412142.1 | gi 662858600 ref NC_013766.2 :21306-22100  |
| hypothetical protein LM5578 0026 | gi 284800281 ref YP003412146.1 | gi 662858600 ref NC_013766.2 :26478-27140  |
| hypothetical protein LM5578 0028 | gi 284800283 ref YP003412148.1 | gi 662858600 ref NC_013766.2 :c28238-27639 |
| hypothetical protein LM5578 0033 | gi 284800288 ref YP003412153.1 | gi 662858600 ref NC_013766.2 :31927-33114  |

|                                                                |                                |                                            |
|----------------------------------------------------------------|--------------------------------|--------------------------------------------|
| amino-terminal domain-containing protein                       | gi 284800292 ref YP003412157.1 | gi 662858600 ref NC_013766.2 :37589-39931  |
| hypothetical protein LM5578 0039                               | gi 284800294 ref YP003412159.1 | gi 662858600 ref NC_013766.2 :41329-42729  |
| hypothetical protein LM5578 0041                               | gi 284800296 ref YP003412161.1 | gi 662858600 ref NC_013766.2 :44023-45216  |
| glucose-inhibited division protein B                           | gi 284800312 ref YP003412177.1 | gi 662858600 ref NC_013766.2 :56888-57604  |
| hypothetical protein LM5578 0063                               | gi 284800318 ref YP003412183.1 | gi 662858600 ref NC_013766.2 :62165-63070  |
| hypothetical protein LM5578 0064                               | gi 284800319 ref YP003412184.1 | gi 662858600 ref NC_013766.2 :63054-63860  |
| hypothetical protein LM5578 0065                               | gi 284800320 ref YP003412185.1 | gi 662858600 ref NC_013766.2 :64032-64886  |
| hypothetical protein LM5578 0067                               | gi 284800322 ref YP003412187.1 | gi 662858600 ref NC_013766.2 :65392-66114  |
| partition protein, ParA-like protein                           | gi 284800323 ref YP003412188.1 | gi 662858600 ref NC_013766.2 :66338-67099  |
| partition protein ParB homolog                                 | gi 284800324 ref YP003412189.1 | gi 662858600 ref NC_013766.2 :67092-67943  |
| catalase                                                       | gi 284800329 ref YP003412194.1 | gi 662858600 ref NC_013766.2 :72319-73785  |
| hypothetical protein LM5578 0075                               | gi 284800330 ref YP003412195.1 | gi 662858600 ref NC_013766.2 :73996-75912  |
| hypothetical protein LM5578 0076                               | gi 284800331 ref YP003412196.1 | gi 662858600 ref NC_013766.2 :76062-77357  |
| bifunctional glutamate--cysteine ligase/glutathione synthetase | gi 284800343 ref YP003412208.1 | gi 662858600 ref NC_013766.2 :c91313-88983 |
| hypothetical protein LM5578 0095                               | gi 284800350 ref YP003412215.1 | gi 662858600 ref NC_013766.2 :c97683-96331 |

|                                    |                                |                                              |
|------------------------------------|--------------------------------|----------------------------------------------|
| DNA topoisomerase III              | gi 284800358 ref YP003412223.1 | gi 662858600 ref NC_013766.2 :105943-108096  |
| hypothetical protein LM5578 0104   | gi 284800359 ref YP003412224.1 | gi 662858600 ref NC_013766.2 :108205-109872  |
| hypothetical protein LM5578 0105   | gi 284800360 ref YP003412225.1 | gi 662858600 ref NC_013766.2 :110051-111388  |
| hypothetical protein LM5578 0108   | gi 284800363 ref YP003412228.1 | gi 662858600 ref NC_013766.2 :c115415-113694 |
| hypothetical protein LM5578 0114   | gi 284800369 ref YP003412234.1 | gi 662858600 ref NC_013766.2 :c122070-120343 |
| hypothetical protein LM5578 0115   | gi 284800370 ref YP003412235.1 | gi 662858600 ref NC_013766.2 :122400-123089  |
| hypothetical protein LM5578 0124   | gi 284800379 ref YP003412244.1 | gi 662858600 ref NC_013766.2 :c131821-130139 |
| hypothetical protein LM5578 0127   | gi 284800382 ref YP003412247.1 | gi 662858600 ref NC_013766.2 :136656-137408  |
| hypothetical protein LM5578 0138   | gi 284800392 ref YP003412257.1 | gi 662858600 ref NC_013766.2 :c144093-143359 |
| putative 6-phosphogluconolactonase | gi 284800393 ref YP003412258.1 | gi 662858600 ref NC_013766.2 :144173-144892  |
| hypothetical protein LM5578 0143   | gi 284800397 ref YP003412262.1 | gi 662858600 ref NC_013766.2 :148951-149964  |
| hypothetical protein LM5578 0145   | gi 284800399 ref YP003412264.1 | gi 662858600 ref NC_013766.2 :151685-153427  |
| pepdidoglycan bound protein        | gi 284800400 ref YP003412265.1 | gi 662858600 ref NC_013766.2 :153568-154515  |
| recombination protein RecR         | gi 284800412 ref YP003412277.1 | gi 662858600 ref NC_013766.2 :164508-165104  |
| hypothetical protein LM5578 0160   | gi 284800414 ref YP003412279.1 | gi 662858600 ref NC_013766.2 :c166252-165410 |

|                                         |                                |                                              |
|-----------------------------------------|--------------------------------|----------------------------------------------|
| hypothetical protein LM5578 0161        | gi 284800415 ref YP003412280.1 | gi 662858600 ref NC_013766.2 :c167212-166373 |
| hypothetical protein LM5578 0166        | gi 284800420 ref YP003412285.1 | gi 662858600 ref NC_013766.2 :170457-171836  |
| hypothetical protein LM5578 0167        | gi 284800421 ref YP003412286.1 | gi 662858600 ref NC_013766.2 :171889-172515  |
| hypothetical protein LM5578 0172        | gi 284800426 ref YP003412291.1 | gi 662858600 ref NC_013766.2 :178815-179945  |
| hypothetical protein LM5578 0176        | gi 284800430 ref YP003412295.1 | gi 662858600 ref NC_013766.2 :c183850-182543 |
| potassium-transporting ATPase subunit A | gi 284800432 ref YP003412297.1 | gi 662858600 ref NC_013766.2 :184632-186317  |
| potassium-transporting atpase c chain   | gi 284800434 ref YP003412299.1 | gi 662858600 ref NC_013766.2 :188389-188961  |
| hypothetical protein LM5578 0181        | gi 284800435 ref YP003412300.1 | gi 662858600 ref NC_013766.2 :188977-191667  |
| hypothetical protein LM5578 0182        | gi 284800436 ref YP003412301.1 | gi 662858600 ref NC_013766.2 :191664-192359  |
| hypothetical protein LM5578 0183        | gi 284800437 ref YP003412302.1 | gi 662858600 ref NC_013766.2 :192400-193212  |
| hypothetical protein LM5578 0192        | gi 284800446 ref YP003412311.1 | gi 662858600 ref NC_013766.2 :198940-201009  |
| hypothetical protein LM5578 0195        | gi 284800449 ref YP003412314.1 | gi 662858600 ref NC_013766.2 :201908-203179  |
| hypothetical protein LM5578 0196        | gi 284800450 ref YP003412315.1 | gi 662858600 ref NC_013766.2 :203216-204268  |
| hypothetical protein LM5578 0197        | gi 284800451 ref YP003412316.1 | gi 662858600 ref NC_013766.2 :204270-205301  |
| hypothetical protein LM5578 0201        | gi 284800455 ref YP003412320.1 | gi 662858600 ref NC_013766.2 :208665-209309  |

|                                  |                                |                                              |
|----------------------------------|--------------------------------|----------------------------------------------|
| elongation factor G              | gi 284800460 ref YP003412325.1 | gi 662858600 ref NC_013766.2 :212507-214594  |
| elongation factor Tu             | gi 284800461 ref YP003412326.1 | gi 662858600 ref NC_013766.2 :214703-215890  |
| hypothetical protein LM5578 0212 | gi 284800466 ref YP003412331.1 | gi 662858600 ref NC_013766.2 :220409-221401  |
| hypothetical protein LM5578 0213 | gi 284800467 ref YP003412332.1 | gi 662858600 ref NC_013766.2 :221414-222163  |
| hypothetical protein LM5578 0214 | gi 284800468 ref YP003412333.1 | gi 662858600 ref NC_013766.2 :222123-222842  |
| hypothetical protein LM5578 0217 | gi 284800471 ref YP003412336.1 | gi 662858600 ref NC_013766.2 :224505-225491  |
| hypothetical protein LM5578 0219 | gi 284800473 ref YP003412338.1 | gi 662858600 ref NC_013766.2 :c227937-226957 |
| hypothetical protein LM5578 0220 | gi 284800474 ref YP003412339.1 | gi 662858600 ref NC_013766.2 :c228501-227959 |
| hypothetical protein LM5578 0222 | gi 284800476 ref YP003412341.1 | gi 662858600 ref NC_013766.2 :c231030-229144 |
| hypothetical protein LM5578 0223 | gi 284800477 ref YP003412342.1 | gi 662858600 ref NC_013766.2 :231478-232377  |
| hypothetical protein LM5578 0224 | gi 284800478 ref YP003412343.1 | gi 662858600 ref NC_013766.2 :232541-233623  |
| hypothetical protein LM5578 0226 | gi 284800480 ref YP003412345.1 | gi 662858600 ref NC_013766.2 :234684-235484  |
| 50S ribosomal protein L3         | gi 284800482 ref YP003412347.1 | gi 662858600 ref NC_013766.2 :236188-236817  |
| 50S ribosomal protein L4         | gi 284800483 ref YP003412348.1 | gi 662858600 ref NC_013766.2 :236843-237466  |
| 50S ribosomal protein L2         | gi 284800485 ref YP003412350.1 | gi 662858600 ref NC_013766.2 :237791-238624  |

|                                                        |                                |                                              |
|--------------------------------------------------------|--------------------------------|----------------------------------------------|
| 30S ribosomal protein S3                               | gi 284800488 ref YP003412353.1 | gi 662858600 ref NC_013766.2 :239371-240027  |
| 50S ribosomal protein L5                               | gi 284800494 ref YP003412359.1 | gi 662858600 ref NC_013766.2 :241760-242299  |
| preprotein translocase subunit SecY                    | gi 284800502 ref YP003412367.1 | gi 662858600 ref NC_013766.2 :245127-246422  |
| hypothetical protein LM5578 0249                       | gi 284800503 ref YP003412368.1 | gi 662858600 ref NC_013766.2 :246482-247129  |
| DNA-directed RNA polymerase subunit alpha              | gi 284800508 ref YP003412373.1 | gi 662858600 ref NC_013766.2 :248856-249800  |
| hypothetical protein LM5578 0258                       | gi 284800512 ref YP003412377.1 | gi 662858600 ref NC_013766.2 :c253236-252574 |
| cobalt transporter ATP-binding subunit                 | gi 284800513 ref YP003412378.1 | gi 662858600 ref NC_013766.2 :253367-254206  |
| cobalt transporter ATP-binding subunit                 | gi 284800514 ref YP003412379.1 | gi 662858600 ref NC_013766.2 :254182-255048  |
| tRNA pseudouridine synthase A                          | gi 284800516 ref YP003412381.1 | gi 662858600 ref NC_013766.2 :255854-256600  |
| hypothetical protein LM5578 0267                       | gi 284800521 ref YP003412386.1 | gi 662858600 ref NC_013766.2 :259878-260729  |
| ATP:guanido phosphotransferase                         | gi 284800526 ref YP003412391.1 | gi 662858600 ref NC_013766.2 :270180-271202  |
| endopeptidase Clp ATP-binding chain C                  | gi 284800527 ref YP003412392.1 | gi 662858600 ref NC_013766.2 :271231-273693  |
| DNA repair protein RadA                                | gi 284800528 ref YP003412393.1 | gi 662858600 ref NC_013766.2 :273839-275212  |
| 2-C-methyl-D-erythritol 4-phosphate cytidyltransferase | gi 284800530 ref YP003412395.1 | gi 662858600 ref NC_013766.2 :276439-277137  |
| RNA polymerase factor sigma-70                         | gi 284800538 ref YP003412403.1 | gi 662858600 ref NC_013766.2 :283275-283880  |

|                                        |                                |                                              |
|----------------------------------------|--------------------------------|----------------------------------------------|
| 50S ribosomal protein L1               | gi 284800543 ref YP003412408.1 | gi 662858600 ref NC_013766.2 :286112-286801  |
| hypothetical protein LM5578 0305       | gi 284800558 ref YP003412423.1 | gi 662858600 ref NC_013766.2 :306990-308450  |
| succinyl-diaminopimelate desuccinylase | gi 284800563 ref YP003412428.1 | gi 662858600 ref NC_013766.2 :315735-316874  |
| hypothetical protein LM5578 0312       | gi 284800565 ref YP003412430.1 | gi 662858600 ref NC_013766.2 :317445-318404  |
| hypothetical protein LM5578 0317       | gi 284800570 ref YP003412435.1 | gi 662858600 ref NC_013766.2 :c324097-323285 |
| hypothetical protein LM5578 0320       | gi 284800573 ref YP003412438.1 | gi 662858600 ref NC_013766.2 :c326536-325694 |
| hypothetical protein LM5578 0321       | gi 284800574 ref YP003412439.1 | gi 662858600 ref NC_013766.2 :c327374-326553 |
| hypothetical protein LM5578 0323       | gi 284800576 ref YP003412441.1 | gi 662858600 ref NC_013766.2 :c329601-328501 |
| hypothetical protein LM5578 0327       | gi 284800580 ref YP003412445.1 | gi 662858600 ref NC_013766.2 :c334456-333677 |
| putative lipoprotein                   | gi 284800584 ref YP003412449.1 | gi 662858600 ref NC_013766.2 :c337057-336236 |
| hypothetical protein LM5578 0333       | gi 284800586 ref YP003412451.1 | gi 662858600 ref NC_013766.2 :338833-339546  |
| hypothetical protein LM5578 0335       | gi 284800588 ref YP003412453.1 | gi 662858600 ref NC_013766.2 :341560-342882  |
| hypothetical protein LM5578 0336       | gi 284800589 ref YP003412454.1 | gi 662858600 ref NC_013766.2 :342885-343724  |
| hypothetical protein LM5578 0337       | gi 284800590 ref YP003412455.1 | gi 662858600 ref NC_013766.2 :343844-344674  |
| hypothetical protein LM5578 0344       | gi 284800597 ref YP003412462.1 | gi 662858600 ref NC_013766.2 :c353316-352003 |



|                                         |                                |                                              |
|-----------------------------------------|--------------------------------|----------------------------------------------|
| hypothetical protein LM5578 0360        | gi 284800613 ref YP003412478.1 | gi 662858600 ref NC_013766.2 :c366592-365939 |
| hypothetical protein LM5578 0362        | gi 284800615 ref YP003412480.1 | gi 662858600 ref NC_013766.2 :367490-368392  |
| short chain dehydrogenase               | gi 284800632 ref YP003412497.1 | gi 662858600 ref NC_013766.2 :c390420-389656 |
| hypothetical protein LM5578 0381        | gi 284800634 ref YP003412499.1 | gi 662858600 ref NC_013766.2 :c391661-390897 |
| hypothetical protein LM5578 0382        | gi 284800635 ref YP003412500.1 | gi 662858600 ref NC_013766.2 :c392315-391665 |
| hypothetical protein LM5578 0383        | gi 284800636 ref YP003412501.1 | gi 662858600 ref NC_013766.2 :c393332-392337 |
| hypothetical protein LM5578 0387        | gi 284800640 ref YP003412505.1 | gi 662858600 ref NC_013766.2 :394787-395551  |
| hypothetical protein LM5578 0389        | gi 284800642 ref YP003412507.1 | gi 662858600 ref NC_013766.2 :c397602-396076 |
| fumarate reductase flavoprotein subunit | gi 284800643 ref YP003412508.1 | gi 662858600 ref NC_013766.2 :397839-399359  |
| hypothetical protein LM5578 0394        | gi 284800647 ref YP003412512.1 | gi 662858600 ref NC_013766.2 :402602-403462  |
| hypothetical protein LM5578 0395        | gi 284800648 ref YP003412513.1 | gi 662858600 ref NC_013766.2 :403519-404289  |
| hypothetical protein LM5578 0405        | gi 284800658 ref YP003412523.1 | gi 662858600 ref NC_013766.2 :c412299-411586 |
| hypothetical protein LM5578 0418        | gi 284800671 ref YP003412536.1 | gi 662858600 ref NC_013766.2 :422365-423186  |
| low temperature requirement protein A   | gi 284800676 ref YP003412541.1 | gi 662858600 ref NC_013766.2 :c428215-427100 |
| uracil-DNA glycosylase                  | gi 284800677 ref YP003412542.1 | gi 662858600 ref NC_013766.2 :428301-429011  |

|                                   |                                |                                              |
|-----------------------------------|--------------------------------|----------------------------------------------|
| hypothetical protein LM5578 0426  | gi 284800679 ref YP003412544.1 | gi 662858600 ref NC_013766.2 :429475-430419  |
| pyrroline-5-carboxylate reductase | gi 284800683 ref YP003412548.1 | gi 662858600 ref NC_013766.2 :c433014-432214 |
| hypothetical protein LM5578 0447  | gi 284800700 ref YP003412565.1 | gi 662858600 ref NC_013766.2 :450630-451439  |
| hypothetical protein LM5578 0448  | gi 284800701 ref YP003412566.1 | gi 662858600 ref NC_013766.2 :451733-453133  |
| hypothetical protein LM5578 0461  | gi 284800714 ref YP003412579.1 | gi 662858600 ref NC_013766.2 :462054-463160  |
| hypothetical protein LM5578 0465  | gi 284800718 ref YP003412583.1 | gi 662858600 ref NC_013766.2 :467357-468103  |
| hypothetical protein LM5578 0470  | gi 284800723 ref YP003412588.1 | gi 662858600 ref NC_013766.2 :473832-474677  |
| hypothetical protein LM5578 0483  | gi 284800736 ref YP003412601.1 | gi 662858600 ref NC_013766.2 :490480-491205  |
| hypothetical protein LM5578 0484  | gi 284800737 ref YP003412602.1 | gi 662858600 ref NC_013766.2 :c491913-491248 |
| hypothetical protein LM5578 0485  | gi 284800738 ref YP003412603.1 | gi 662858600 ref NC_013766.2 :c492689-491934 |
| hypothetical protein LM5578 0487  | gi 284800740 ref YP003412605.1 | gi 662858600 ref NC_013766.2 :c496111-494963 |
| hypothetical protein LM5578 0488  | gi 284800741 ref YP003412606.1 | gi 662858600 ref NC_013766.2 :c497063-496116 |
| hypothetical protein LM5578 0490  | gi 284800743 ref YP003412608.1 | gi 662858600 ref NC_013766.2 :498948-500231  |
| hypothetical protein LM5578 0491  | gi 284800744 ref YP003412609.1 | gi 662858600 ref NC_013766.2 :500232-501332  |
| hypothetical protein LM5578 0508  | gi 284800760 ref YP003412625.1 | gi 662858600 ref NC_013766.2 :515774-516349  |

|                                         |                                |                                              |
|-----------------------------------------|--------------------------------|----------------------------------------------|
| hypothetical protein LM5578 0517        | gi 284800769 ref YP003412634.1 | gi 662858600 ref NC_013766.2 :525328-525921  |
| hypothetical protein LM5578 0518        | gi 284800770 ref YP003412635.1 | gi 662858600 ref NC_013766.2 :526107-527066  |
| hypothetical protein LM5578 0522        | gi 284800774 ref YP003412639.1 | gi 662858600 ref NC_013766.2 :529566-530234  |
| hypothetical protein LM5578 0524        | gi 284800776 ref YP003412641.1 | gi 662858600 ref NC_013766.2 :531000-533060  |
| hypothetical protein LM5578 0525        | gi 284800777 ref YP003412642.1 | gi 662858600 ref NC_013766.2 :533064-533666  |
| hypothetical protein LM5578 0528        | gi 284800780 ref YP003412645.1 | gi 662858600 ref NC_013766.2 :534587-535237  |
| hypothetical protein LM5578 0531        | gi 284800783 ref YP003412648.1 | gi 662858600 ref NC_013766.2 :536604-537875  |
| phosphoribosyl pyrophosphate synthetase | gi 284800784 ref YP003412649.1 | gi 662858600 ref NC_013766.2 :538015-538950  |
| hypothetical protein LM5578 0539        | gi 284800791 ref YP003412656.1 | gi 662858600 ref NC_013766.2 :c546497-545067 |
| hypothetical protein LM5578 0540        | gi 284800792 ref YP003412657.1 | gi 662858600 ref NC_013766.2 :c547433-546618 |
| hypothetical protein LM5578 0543        | gi 284800795 ref YP003412660.1 | gi 662858600 ref NC_013766.2 :549773-550780  |
| hypothetical protein LM5578 0552        | gi 284800804 ref YP003412669.1 | gi 662858600 ref NC_013766.2 :c563736-562075 |
| hypothetical protein LM5578 0554        | gi 284800806 ref YP003412671.1 | gi 662858600 ref NC_013766.2 :c566109-565369 |
| transmembrane protein                   | gi 284800807 ref YP003412672.1 | gi 662858600 ref NC_013766.2 :566339-567814  |
| hypothetical protein LM5578 0557        | gi 284800809 ref YP003412674.1 | gi 662858600 ref NC_013766.2 :569314-570564  |

|                                  |                                |                                              |
|----------------------------------|--------------------------------|----------------------------------------------|
| hypothetical protein LM5578 0559 | gi 284800811 ref YP003412676.1 | gi 662858600 ref NC_013766.2 :572644-573498  |
| hypothetical protein LM5578 0562 | gi 284800814 ref YP003412679.1 | gi 662858600 ref NC_013766.2 :574754-576109  |
| hypothetical protein LM5578 0563 | gi 284800815 ref YP003412680.1 | gi 662858600 ref NC_013766.2 :c577117-576149 |
| hypothetical protein LM5578 0568 | gi 284800820 ref YP003412685.1 | gi 662858600 ref NC_013766.2 :582429-583622  |
| hypothetical protein LM5578 0569 | gi 284800821 ref YP003412686.1 | gi 662858600 ref NC_013766.2 :c584582-583662 |
| hypothetical protein LM5578 0571 | gi 284800823 ref YP003412688.1 | gi 662858600 ref NC_013766.2 :c586048-585062 |
| hypothetical protein LM5578 0572 | gi 284800824 ref YP003412689.1 | gi 662858600 ref NC_013766.2 :c586590-586069 |
| hypothetical protein LM5578 0574 | gi 284800826 ref YP003412691.1 | gi 662858600 ref NC_013766.2 :c588300-587050 |
| hypothetical protein LM5578 0575 | gi 284800827 ref YP003412692.1 | gi 662858600 ref NC_013766.2 :c589505-588558 |
| hypothetical protein LM5578 0579 | gi 284800831 ref YP003412696.1 | gi 662858600 ref NC_013766.2 :592949-593791  |
| hypothetical protein LM5578 0581 | gi 284800833 ref YP003412698.1 | gi 662858600 ref NC_013766.2 :c595590-594955 |
| hypothetical protein LM5578 0582 | gi 284800834 ref YP003412699.1 | gi 662858600 ref NC_013766.2 :595800-596981  |
| hypothetical protein LM5578 0586 | gi 284800838 ref YP003412703.1 | gi 662858600 ref NC_013766.2 :c601163-600123 |
| hypothetical protein LM5578 0587 | gi 284800839 ref YP003412704.1 | gi 662858600 ref NC_013766.2 :601554-602468  |
| glutamate dehydrogenase          | gi 284800840 ref YP003412705.1 | gi 662858600 ref NC_013766.2 :c603887-602511 |

|                                                  |                                |                                              |
|--------------------------------------------------|--------------------------------|----------------------------------------------|
| ATP phosphoribosyltransferase regulatory subunit | gi 284800849 ref YP003412714.1 | gi 662858600 ref NC_013766.2 :c610763-609582 |
| histidinol-phosphatase                           | gi 284800850 ref YP003412715.1 | gi 662858600 ref NC_013766.2 :610915-611742  |
| hypothetical protein LM5578 0608                 | gi 284800860 ref YP003412725.1 | gi 662858600 ref NC_013766.2 :620510-621172  |
| preprotein translocase subunit SecA              | gi 284800863 ref YP003412728.1 | gi 662858600 ref NC_013766.2 :624342-626672  |
| hypothetical protein LM5578 0612                 | gi 284800864 ref YP003412729.1 | gi 662858600 ref NC_013766.2 :626788-627960  |
| hypothetical protein LM5578 0618                 | gi 284800870 ref YP003412735.1 | gi 662858600 ref NC_013766.2 :634575-636344  |
| hypothetical protein LM5578 0619                 | gi 284800871 ref YP003412736.1 | gi 662858600 ref NC_013766.2 :636341-637114  |
| hypothetical protein LM5578 0620                 | gi 284800872 ref YP003412737.1 | gi 662858600 ref NC_013766.2 :637242-637784  |
| hypothetical protein LM5578 0621                 | gi 284800873 ref YP003412738.1 | gi 662858600 ref NC_013766.2 :638012-638812  |
| homoserine O-acetyltransferase                   | gi 284800874 ref YP003412739.1 | gi 662858600 ref NC_013766.2 :c639957-638851 |
| hypothetical protein LM5578 0623                 | gi 284800875 ref YP003412740.1 | gi 662858600 ref NC_013766.2 :c641251-639974 |
| hypothetical protein LM5578 0625                 | gi 284800877 ref YP003412742.1 | gi 662858600 ref NC_013766.2 :c643016-642315 |
| putative biotin biosynthesis protein BioY        | gi 284800878 ref YP003412743.1 | gi 662858600 ref NC_013766.2 :c643640-643092 |
| hypothetical protein LM5578 0628                 | gi 284800880 ref YP003412745.1 | gi 662858600 ref NC_013766.2 :644159-644749  |
| hypothetical protein LM5578 0635                 | gi 284800887 ref YP003412752.1 | gi 662858600 ref NC_013766.2 :649400-651124  |

|                                             |                                |                                              |
|---------------------------------------------|--------------------------------|----------------------------------------------|
| azoreductase                                | gi 284800891 ref YP003412756.1 | gi 662858600 ref NC_013766.2 :c655954-655328 |
| hypothetical protein LM5578 0641            | gi 284800893 ref YP003412758.1 | gi 662858600 ref NC_013766.2 :656575-657516  |
| glycerophosphoryl diester phosphodiesterase | gi 284800896 ref YP003412761.1 | gi 662858600 ref NC_013766.2 :658491-660242  |
| hypothetical protein LM5578 0653            | gi 284800905 ref YP003412770.1 | gi 662858600 ref NC_013766.2 :c665705-665004 |
| hypothetical protein LM5578 0654            | gi 284800906 ref YP003412771.1 | gi 662858600 ref NC_013766.2 :c667470-665791 |
| pepidoglycan bound protein                  | gi 284800907 ref YP003412772.1 | gi 662858600 ref NC_013766.2 :667776-672524  |
| hypothetical protein LM5578 0663            | gi 284800915 ref YP003412780.1 | gi 662858600 ref NC_013766.2 :679097-679801  |
| hypothetical protein LM5578 0714            | gi 284800966 ref YP003412831.1 | gi 662858600 ref NC_013766.2 :717886-718803  |
| hypothetical protein LM5578 0715            | gi 284800967 ref YP003412832.1 | gi 662858600 ref NC_013766.2 :719069-720949  |
| hypothetical protein LM5578 0718            | gi 284800970 ref YP003412835.1 | gi 662858600 ref NC_013766.2 :721916-722566  |
| hypothetical protein LM5578 0719            | gi 284800971 ref YP003412836.1 | gi 662858600 ref NC_013766.2 :c724447-722606 |
| hypothetical protein LM5578 0721            | gi 284800973 ref YP003412838.1 | gi 662858600 ref NC_013766.2 :726142-726981  |
| hypothetical protein LM5578 0723            | gi 284800975 ref YP003412840.1 | gi 662858600 ref NC_013766.2 :727446-728396  |
| hypothetical protein LM5578 0724            | gi 284800976 ref YP003412841.1 | gi 662858600 ref NC_013766.2 :728420-729061  |
| hypothetical protein LM5578 0726            | gi 284800978 ref YP003412843.1 | gi 662858600 ref NC_013766.2 :731840-732487  |

|                                            |                                |                                             |
|--------------------------------------------|--------------------------------|---------------------------------------------|
| hypothetical protein LM5578 0727           | gi 284800979 ref YP003412844.1 | gi 662858600 ref NC_013766.2:c733032-732496 |
| hypothetical protein LM5578 0728           | gi 284800980 ref YP003412845.1 | gi 662858600 ref NC_013766.2:c733942-733019 |
| hypothetical protein LM5578 0733           | gi 284800985 ref YP003412850.1 | gi 662858600 ref NC_013766.2:736309-736944  |
| hypothetical protein LM5578 0734           | gi 284800986 ref YP003412851.1 | gi 662858600 ref NC_013766.2:c737830-736934 |
| hypothetical protein LM5578 0740           | gi 284800992 ref YP003412857.1 | gi 662858600 ref NC_013766.2:740652-741215  |
| flagellar biosynthesis protein FliR        | gi 284801008 ref YP003412873.1 | gi 662858600 ref NC_013766.2:750008-750769  |
| flagellar biosynthesis protein FlhA        | gi 284801010 ref YP003412875.1 | gi 662858600 ref NC_013766.2:751878-753953  |
| flagellar biosynthesis regulator FlhF      | gi 284801011 ref YP003412876.1 | gi 662858600 ref NC_013766.2:753975-755198  |
| hypothetical protein LM5578 0762           | gi 284801013 ref YP003412878.1 | gi 662858600 ref NC_013766.2:756003-756791  |
| flagellar motor protein MotA               | gi 284801015 ref YP003412880.1 | gi 662858600 ref NC_013766.2:757178-758029  |
| hypothetical protein LM5578 0765           | gi 284801016 ref YP003412881.1 | gi 662858600 ref NC_013766.2:757989-758816  |
| hypothetical protein LM5578 0767           | gi 284801018 ref YP003412883.1 | gi 662858600 ref NC_013766.2:759349-761262  |
| flagellin                                  | gi 284801020 ref YP003412885.1 | gi 662858600 ref NC_013766.2:762421-763284  |
| two-component sensor histidine kinase CheA | gi 284801022 ref YP003412887.1 | gi 662858600 ref NC_013766.2:763938-765794  |
| hypothetical protein LM5578 0774           | gi 284801025 ref YP003412890.1 | gi 662858600 ref NC_013766.2:766551-767597  |

|                                        |                                |                                             |
|----------------------------------------|--------------------------------|---------------------------------------------|
| hypothetical protein LM5578 0780       | gi 284801031 ref YP003412896.1 | gi 662858600 ref NC_013766.2 :772095-773498 |
| flagellar hook-associated protein FlgK | gi 284801035 ref YP003412900.1 | gi 662858600 ref NC_013766.2 :775716-777236 |
| flagellar hook-associated protein FlgL | gi 284801036 ref YP003412901.1 | gi 662858600 ref NC_013766.2 :777248-778123 |
| flagellar capping protein              | gi 284801037 ref YP003412902.1 | gi 662858600 ref NC_013766.2 :778135-779424 |
| flagellar MS-ring protein              | gi 284801043 ref YP003412908.1 | gi 662858600 ref NC_013766.2 :781307-782959 |
| flagellar assembly protein H           | gi 284801045 ref YP003412910.1 | gi 662858600 ref NC_013766.2 :784055-784747 |
| hypothetical protein LM5578 0796       | gi 284801047 ref YP003412912.1 | gi 662858600 ref NC_013766.2 :786062-786730 |
| hypothetical protein LM5578 0797       | gi 284801048 ref YP003412913.1 | gi 662858600 ref NC_013766.2 :786744-787388 |
| hypothetical protein LM5578 0803       | gi 284801054 ref YP003412919.1 | gi 662858600 ref NC_013766.2 :792833-793561 |
| hypothetical protein LM5578 0807       | gi 284801058 ref YP003412923.1 | gi 662858600 ref NC_013766.2 :796181-796921 |
| hypothetical protein LM5578 0822       | gi 284801073 ref YP003412938.1 | gi 662858600 ref NC_013766.2 :809836-810525 |
| hypothetical protein LM5578 0823       | gi 284801074 ref YP003412939.1 | gi 662858600 ref NC_013766.2 :810522-811226 |
| hypothetical protein LM5578 0825       | gi 284801076 ref YP003412941.1 | gi 662858600 ref NC_013766.2 :813270-813773 |
| hypothetical protein LM5578 0839       | gi 284801090 ref YP003412955.1 | gi 662858600 ref NC_013766.2 :822311-823273 |
| hypothetical protein LM5578 0840       | gi 284801091 ref YP003412956.1 | gi 662858600 ref NC_013766.2 :823280-823888 |



|                                         |                                |                                              |
|-----------------------------------------|--------------------------------|----------------------------------------------|
| hypothetical protein LM5578 0841        | gi 284801092 ref YP003412957.1 | gi 662858600 ref NC_013766.2 :823898-824518  |
| hypothetical protein LM5578 0842        | gi 284801093 ref YP003412958.1 | gi 662858600 ref NC_013766.2 :824846-826102  |
| hypothetical protein LM5578 0843        | gi 284801094 ref YP003412959.1 | gi 662858600 ref NC_013766.2 :826168-827040  |
| hypothetical protein LM5578 0844        | gi 284801095 ref YP003412960.1 | gi 662858600 ref NC_013766.2 :827046-828035  |
| hypothetical protein LM5578 0852        | gi 284801103 ref YP003412968.1 | gi 662858600 ref NC_013766.2 :835666-836313  |
| hypothetical protein LM5578 0853        | gi 284801104 ref YP003412969.1 | gi 662858600 ref NC_013766.2 :c837342-836353 |
| hypothetical protein LM5578 0854        | gi 284801105 ref YP003412970.1 | gi 662858600 ref NC_013766.2 :837521-838450  |
| hypothetical protein LM5578 0856        | gi 284801107 ref YP003412972.1 | gi 662858600 ref NC_013766.2 :c839727-838861 |
| mannose-specific PTS system protein IID | gi 284801112 ref YP003412977.1 | gi 662858600 ref NC_013766.2 :c843298-842420 |
| hypothetical protein LM5578 0862        | gi 284801113 ref YP003412978.1 | gi 662858600 ref NC_013766.2 :c844129-843317 |
| hypothetical protein LM5578 0865        | gi 284801116 ref YP003412981.1 | gi 662858600 ref NC_013766.2 :c848325-845509 |
| hypothetical protein LM5578 0873        | gi 284801124 ref YP003412989.1 | gi 662858600 ref NC_013766.2 :c859846-859145 |
| hypothetical protein LM5578 0874        | gi 284801125 ref YP003412990.1 | gi 662858600 ref NC_013766.2 :c860602-859961 |
| hypothetical protein LM5578 0876        | gi 284801127 ref YP003412992.1 | gi 662858600 ref NC_013766.2 :c862243-861713 |
| hypothetical protein LM5578 0879        | gi 284801130 ref YP003412995.1 | gi 662858600 ref NC_013766.2 :c865586-864825 |

|                                                                                       |                                |                                              |
|---------------------------------------------------------------------------------------|--------------------------------|----------------------------------------------|
| hypothetical protein LM5578 0881                                                      | gi 284801132 ref YP003412997.1 | gi 662858600 ref NC_013766.2 :866244-866882  |
| hypothetical protein LM5578 0891                                                      | gi 284801142 ref YP003413007.1 | gi 662858600 ref NC_013766.2 :875501-876043  |
| hypothetical protein LM5578 0898                                                      | gi 284801149 ref YP003413014.1 | gi 662858600 ref NC_013766.2 :882575-883423  |
| hypothetical protein LM5578 0899                                                      | gi 284801150 ref YP003413015.1 | gi 662858600 ref NC_013766.2 :883533-884090  |
| hypothetical protein LM5578 0900                                                      | gi 284801151 ref YP003413016.1 | gi 662858600 ref NC_013766.2 :884107-884769  |
| hypothetical protein LM5578 0902                                                      | gi 284801153 ref YP003413018.1 | gi 662858600 ref NC_013766.2 :885295-886119  |
| hypothetical protein LM5578 0905                                                      | gi 284801156 ref YP003413021.1 | gi 662858600 ref NC_013766.2 :888685-890319  |
| hypothetical protein LM5578 0909                                                      | gi 284801160 ref YP003413025.1 | gi 662858600 ref NC_013766.2 :c897582-895636 |
| hypothetical protein LM5578 0910                                                      | gi 284801161 ref YP003413026.1 | gi 662858600 ref NC_013766.2 :c898623-897712 |
| hypothetical protein LM5578 0918                                                      | gi 284801168 ref YP003413033.1 | gi 662858600 ref NC_013766.2 :c907773-906553 |
| hypothetical protein LM5578 0924                                                      | gi 284801174 ref YP003413039.1 | gi 662858600 ref NC_013766.2 :918946-920049  |
| hypothetical protein LM5578 0925                                                      | gi 284801175 ref YP003413040.1 | gi 662858600 ref NC_013766.2 :920154-921254  |
| UDP-N-acetylmuramoylalanyl-D-glutamyl-2, 6- diamino pimelate-D-alanyl-D-alanyl ligase | gi 284801185 ref YP003413050.1 | gi 662858600 ref NC_013766.2 :929781-931193  |
| hypothetical protein LM5578 0937                                                      | gi 284801187 ref YP003413052.1 | gi 662858600 ref NC_013766.2 :c933010-931985 |

|                                                                                        |                                |                                              |
|----------------------------------------------------------------------------------------|--------------------------------|----------------------------------------------|
| hypothetical protein LM5578 0942                                                       | gi 284801192 ref YP003413057.1 | gi 662858600 ref NC_013766.2 :937819-938733  |
| hypothetical protein LM5578 0944                                                       | gi 284801194 ref YP003413059.1 | gi 662858600 ref NC_013766.2 :939894-941492  |
| hypothetical protein LM5578 0946                                                       | gi 284801196 ref YP003413061.1 | gi 662858600 ref NC_013766.2 :941938-943506  |
| hypothetical protein LM5578 0953                                                       | gi 284801203 ref YP003413068.1 | gi 662858600 ref NC_013766.2 :948354-950372  |
| hypothetical protein LM5578 0969                                                       | gi 284801219 ref YP003413084.1 | gi 662858600 ref NC_013766.2 :963092-963928  |
| RNA polymerase sigma factor SigB                                                       | gi 284801225 ref YP003413090.1 | gi 662858600 ref NC_013766.2 :966653-967432  |
| indirect negative regulation of sigma B dependant gene expression (serine phosphatase) | gi 284801226 ref YP003413091.1 | gi 662858600 ref NC_013766.2 :967433-968032  |
| hypothetical protein LM5578 0977                                                       | gi 284801227 ref YP003413092.1 | gi 662858600 ref NC_013766.2 :968239-969864  |
| hypothetical protein LM5578 0982                                                       | gi 284801232 ref YP003413097.1 | gi 662858600 ref NC_013766.2 :973722-975008  |
| hypothetical protein LM5578 0983                                                       | gi 284801233 ref YP003413098.1 | gi 662858600 ref NC_013766.2 :975089-975802  |
| hypothetical protein LM5578 0986                                                       | gi 284801236 ref YP003413101.1 | gi 662858600 ref NC_013766.2 :977598-978095  |
| hypothetical protein LM5578 0989                                                       | gi 284801239 ref YP003413104.1 | gi 662858600 ref NC_013766.2 :c981362-980226 |
| hypothetical protein LM5578 0993                                                       | gi 284801243 ref YP003413108.1 | gi 662858600 ref NC_013766.2 :983701-984513  |
| hypothetical protein LM5578 0999                                                       | gi 284801249 ref YP003413114.1 | gi 662858600 ref NC_013766.2 :989825-991723  |

|                                  |                                |                                                |
|----------------------------------|--------------------------------|------------------------------------------------|
| hypothetical protein LM5578 1001 | gi 284801251 ref YP003413116.1 | gi 662858600 ref NC_013766.2 :993707-994747    |
| hypothetical protein LM5578 1002 | gi 284801252 ref YP003413117.1 | gi 662858600 ref NC_013766.2 :994766-995605    |
| pantothenate kinase              | gi 284801253 ref YP003413118.1 | gi 662858600 ref NC_013766.2 :995694-996614    |
| hypothetical protein LM5578 1005 | gi 284801255 ref YP003413120.1 | gi 662858600 ref NC_013766.2 :997453-998568    |
| hypothetical protein LM5578 1006 | gi 284801256 ref YP003413121.1 | gi 662858600 ref NC_013766.2 :998591-999247    |
| hypothetical protein LM5578 1007 | gi 284801257 ref YP003413122.1 | gi 662858600 ref NC_013766.2 :c1001239-999278  |
| hypothetical protein LM5578 1009 | gi 284801259 ref YP003413124.1 | gi 662858600 ref NC_013766.2 :1001497-1002120  |
| hypothetical protein LM5578 1010 | gi 284801260 ref YP003413125.1 | gi 662858600 ref NC_013766.2 :1002229-1002897  |
| hypothetical protein LM5578 1013 | gi 284801263 ref YP003413128.1 | gi 662858600 ref NC_013766.2 :c1005408-1004803 |
| hypothetical protein LM5578 1017 | gi 284801267 ref YP003413132.1 | gi 662858600 ref NC_013766.2 :1008703-1009443  |
| hypothetical protein LM5578 1029 | gi 284801279 ref YP003413144.1 | gi 662858600 ref NC_013766.2 :c1019631-1018942 |
| hypothetical protein LM5578 1032 | gi 284801282 ref YP003413147.1 | gi 662858600 ref NC_013766.2 :c1022549-1021728 |
| hypothetical protein LM5578 1039 | gi 284801289 ref YP003413154.1 | gi 662858600 ref NC_013766.2 :1026952-1027674  |
| hypothetical protein LM5578 1040 | gi 284801290 ref YP003413155.1 | gi 662858600 ref NC_013766.2 :1027794-1028849  |
| hypothetical protein LM5578 1041 | gi 284801291 ref YP003413156.1 | gi 662858600 ref NC_013766.2 :1028962-1029870  |

|                                                                                       |                                |                                                |
|---------------------------------------------------------------------------------------|--------------------------------|------------------------------------------------|
| hypothetical protein LM5578 1042                                                      | gi 284801292 ref YP003413157.1 | gi 662858600 ref NC_013766.2 :1029884-1031110  |
| hypothetical protein LM5578 1048                                                      | gi 284801298 ref YP003413163.1 | gi 662858600 ref NC_013766.2 :1035006-1035674  |
| hypothetical protein LM5578 1050                                                      | gi 284801300 ref YP003413165.1 | gi 662858600 ref NC_013766.2 :1036519-1037409  |
| DltD protein for D-alanine esterification of lipoteichoic acid and wall teichoic acid | gi 284801302 ref YP003413167.1 | gi 662858600 ref NC_013766.2 :c1039577-1038303 |
| hypothetical protein LM5578 1059                                                      | gi 284801309 ref YP003413174.1 | gi 662858600 ref NC_013766.2 :c1044863-1044114 |
| hypothetical protein LM5578 1061                                                      | gi 284801311 ref YP003413176.1 | gi 662858600 ref NC_013766.2 :1046299-1047063  |
| hypothetical protein LM5578 1064                                                      | gi 284801314 ref YP003413179.1 | gi 662858600 ref NC_013766.2 :1049491-1050513  |
| hypothetical protein LM5578 1068                                                      | gi 284801318 ref YP003413183.1 | gi 662858600 ref NC_013766.2 :1052016-1052927  |
| peptide chain release factor 3                                                        | gi 284801320 ref YP003413185.1 | gi 662858600 ref NC_013766.2 :1053856-1055424  |
| ATP-dependent protease                                                                | gi 284801329 ref YP003413194.1 | gi 662858600 ref NC_013766.2 :c1065032-1062858 |
| hypothetical protein LM5578 1081                                                      | gi 284801331 ref YP003413196.1 | gi 662858600 ref NC_013766.2 :1065952-1066743  |
| hypothetical protein LM5578 1082                                                      | gi 284801332 ref YP003413197.1 | gi 662858600 ref NC_013766.2 :c1068210-1066744 |
| phosphotransferase system enzyme I                                                    | gi 284801335 ref YP003413200.1 | gi 662858600 ref NC_013766.2 :1069177-1070895  |
| hypothetical protein LM5578 1087                                                      | gi 284801337 ref YP003413202.1 | gi 662858600 ref NC_013766.2 :1072055-1072915  |
| hypothetical protein LM5578 1088                                                      | gi 284801338 ref YP            | gi 662858600 ref NC_013766.2 :c1074103-1072958 |

|                                  |                                |                                                |
|----------------------------------|--------------------------------|------------------------------------------------|
|                                  | 003413203.1                    |                                                |
| hypothetical protein LM5578 1092 | gi 284801342 ref YP003413207.1 | gi 662858600 ref NC_013766.2 :1075732-1076610  |
| hypothetical protein LM5578 1093 | gi 284801343 ref YP003413208.1 | gi 662858600 ref NC_013766.2 :1076658-1077368  |
| hypothetical protein LM5578 1094 | gi 284801344 ref YP003413209.1 | gi 662858600 ref NC_013766.2 :1077432-1078547  |
| hypothetical protein LM5578 1095 | gi 284801345 ref YP003413210.1 | gi 662858600 ref NC_013766.2 :c1079472-1078591 |
| hypothetical protein LM5578 1096 | gi 284801346 ref YP003413211.1 | gi 662858600 ref NC_013766.2 :1079807-1081000  |
| hypothetical protein LM5578 1097 | gi 284801347 ref YP003413212.1 | gi 662858600 ref NC_013766.2 :1080993-1081841  |
| hypothetical protein LM5578 1102 | gi 284801352 ref YP003413217.1 | gi 662858600 ref NC_013766.2 :1085257-1085970  |
| hypothetical protein LM5578 1103 | gi 284801353 ref YP003413218.1 | gi 662858600 ref NC_013766.2 :1085967-1087025  |
| hypothetical protein LM5578 1104 | gi 284801354 ref YP003413219.1 | gi 662858600 ref NC_013766.2 :1087022-1087660  |
| hypothetical protein LM5578 1105 | gi 284801355 ref YP003413220.1 | gi 662858600 ref NC_013766.2 :1087679-1088338  |
| hypothetical protein LM5578 1106 | gi 284801356 ref YP003413221.1 | gi 662858600 ref NC_013766.2 :1088493-1089413  |
| hypothetical protein LM5578 1108 | gi 284801358 ref YP003413223.1 | gi 662858600 ref NC_013766.2 :c1091268-1090303 |
| hypothetical protein LM5578 1109 | gi 284801359 ref YP003413224.1 | gi 662858600 ref NC_013766.2 :c1093044-1091377 |
| hypothetical protein LM5578 1111 | gi 284801361 ref YP003413226.1 | gi 662858600 ref NC_013766.2 :1093745-1094515  |

|                                    |                                |                                                |
|------------------------------------|--------------------------------|------------------------------------------------|
| hypothetical protein LM5578 1122   | gi 284801371 ref YP003413236.1 | gi 662858600 ref NC_013766.2 :c1105801-1105139 |
| hypothetical protein LM5578 1124   | gi 284801373 ref YP003413238.1 | gi 662858600 ref NC_013766.2 :1106580-1107350  |
| hypothetical protein LM5578 1125   | gi 284801374 ref YP003413239.1 | gi 662858600 ref NC_013766.2 :1107445-1108668  |
| hypothetical protein LM5578 1132   | gi 284801381 ref YP003413246.1 | gi 662858600 ref NC_013766.2 :c1112841-1111843 |
| hypothetical protein LM5578 1133   | gi 284801382 ref YP003413247.1 | gi 662858600 ref NC_013766.2 :1112972-1113526  |
| peptide deformylase                | gi 284801383 ref YP003413248.1 | gi 662858600 ref NC_013766.2 :c1114126-1113575 |
| hypothetical protein LM5578 1135   | gi 284801384 ref YP003413249.1 | gi 662858600 ref NC_013766.2 :1114960-1116075  |
| dihydrolipoamide acetyltransferase | gi 284801386 ref YP003413251.1 | gi 662858600 ref NC_013766.2 :1117166-1118800  |
| hypothetical protein LM5578 1140   | gi 284801389 ref YP003413254.1 | gi 662858600 ref NC_013766.2 :1120836-1121789  |
| hypothetical protein LM5578 1147   | gi 284801396 ref YP003413261.1 | gi 662858600 ref NC_013766.2 :c1128037-1127093 |
| hypothetical protein LM5578 1148   | gi 284801397 ref YP003413262.1 | gi 662858600 ref NC_013766.2 :c1128852-1128238 |
| hypothetical protein LM5578 1150   | gi 284801399 ref YP003413264.1 | gi 662858600 ref NC_013766.2 :1129948-1131786  |
| hypothetical protein LM5578 1154   | gi 284801403 ref YP003413268.1 | gi 662858600 ref NC_013766.2 :1133762-1134970  |
| pyruvate carboxylase               | gi 284801404 ref YP003413269.1 | gi 662858600 ref NC_013766.2 :1135248-1138688  |
| hypothetical protein LM5578 1156   | gi 284801405 ref YP003413270.1 | gi 662858600 ref NC_013766.2 :1138840-1139739  |

|                                                   |                                |                                                |
|---------------------------------------------------|--------------------------------|------------------------------------------------|
| NAD synthetase                                    | gi 284801425 ref YP003413290.1 | gi 662858600 ref NC_013766.2 :1164188-1165012  |
| hypothetical protein LM5578 1204                  | gi 284801451 ref YP003413316.1 | gi 662858600 ref NC_013766.2 :1188827-1190542  |
| ATP-dependent Clp protease proteolytic subunit    | gi 284801459 ref YP003413324.1 | gi 662858600 ref NC_013766.2 :c1197311-1196739 |
| hypothetical protein LM5578 1215                  | gi 284801462 ref YP003413327.1 | gi 662858600 ref NC_013766.2 :1198546-1199901  |
| hypothetical protein LM5578 1219                  | gi 284801466 ref YP003413331.1 | gi 662858600 ref NC_013766.2 :1201412-1202161  |
| hypothetical protein LM5578 1221                  | gi 284801468 ref YP003413333.1 | gi 662858600 ref NC_013766.2 :1202717-1203463  |
| hypothetical protein LM5578 1222                  | gi 284801469 ref YP003413334.1 | gi 662858600 ref NC_013766.2 :1203464-1204039  |
| hypothetical protein LM5578 1225                  | gi 284801472 ref YP003413337.1 | gi 662858600 ref NC_013766.2 :1205914-1206717  |
| hypothetical protein LM5578 1226                  | gi 284801473 ref YP003413338.1 | gi 662858600 ref NC_013766.2 :1206736-1208400  |
| hypothetical protein LM5578 1227                  | gi 284801474 ref YP003413339.1 | gi 662858600 ref NC_013766.2 :1208438-1209097  |
| hypothetical protein LM5578 1233                  | gi 284801480 ref YP003413345.1 | gi 662858600 ref NC_013766.2 :1212589-1213224  |
| ATP:cob(D)alamin adenosyltransferase protein PduO | gi 284801484 ref YP003413349.1 | gi 662858600 ref NC_013766.2 :1214843-1215838  |
| hypothetical protein LM5578 1239                  | gi 284801486 ref YP003413351.1 | gi 662858600 ref NC_013766.2 :1217270-1218388  |
| hypothetical protein LM5578 1241                  | gi 284801488 ref YP003413353.1 | gi 662858600 ref NC_013766.2 :1219186-1220379  |
| threonine-phosphate decarboxylase                 | gi 284801489 ref YP            | gi 662858600 ref NC_013766.2 :1220393-1221478  |



|                                            |                                |                                               |
|--------------------------------------------|--------------------------------|-----------------------------------------------|
|                                            | 003413354.1                    |                                               |
| hypothetical protein LM5578 1243           | gi 284801490 ref YP003413355.1 | gi 662858600 ref NC_013766.2 :1221468-1222343 |
| hypothetical protein LM5578 1245           | gi 284801492 ref YP003413357.1 | gi 662858600 ref NC_013766.2 :1224296-1224928 |
| hypothetical protein LM5578 1248           | gi 284801495 ref YP003413360.1 | gi 662858600 ref NC_013766.2 :1227930-1229294 |
| ethanolamine ammonia-lyase small subunit   | gi 284801496 ref YP003413361.1 | gi 662858600 ref NC_013766.2 :1229314-1230195 |
| hypothetical protein LM5578 1250           | gi 284801497 ref YP003413362.1 | gi 662858600 ref NC_013766.2 :1230218-1230871 |
| hypothetical protein LM5578 1252           | gi 284801499 ref YP003413364.1 | gi 662858600 ref NC_013766.2 :1231407-1232867 |
| hypothetical protein LM5578 1254           | gi 284801501 ref YP003413366.1 | gi 662858600 ref NC_013766.2 :1233349-1234104 |
| hypothetical protein LM5578 1255           | gi 284801502 ref YP003413367.1 | gi 662858600 ref NC_013766.2 :1234117-1234758 |
| hypothetical protein LM5578 1256           | gi 284801503 ref YP003413368.1 | gi 662858600 ref NC_013766.2 :1234755-1235327 |
| hypothetical protein LM5578 1258           | gi 284801505 ref YP003413370.1 | gi 662858600 ref NC_013766.2 :1235604-1236149 |
| precorrin-8X methylmutase                  | gi 284801513 ref YP003413378.1 | gi 662858600 ref NC_013766.2 :1243430-1244062 |
| cobalt-precorrin-6Y C(5)-methyltransferase | gi 284801515 ref YP003413380.1 | gi 662858600 ref NC_013766.2 :1245196-1245792 |
| hypothetical protein LM5578 1274           | gi 284801521 ref YP003413386.1 | gi 662858600 ref NC_013766.2 :1249595-1251076 |
| hypothetical protein LM5578 1275           | gi 284801522 ref YP003413387.1 | gi 662858600 ref NC_013766.2 :1251073-1251858 |

|                                                         |                                |                                                |
|---------------------------------------------------------|--------------------------------|------------------------------------------------|
| cobalt-precorrin-2 C(20)-methyltransferase              | gi 284801523 ref YP003413388.1 | gi 662858600 ref NC_013766.2 :1251851-1252561  |
| cobalt transport protein CbiM                           | gi 284801524 ref YP003413389.1 | gi 662858600 ref NC_013766.2 :1252558-1253292  |
| hypothetical protein LM5578 1279                        | gi 284801526 ref YP003413391.1 | gi 662858600 ref NC_013766.2 :1253548-1254249  |
| hypothetical protein LM5578 1289                        | gi 284801536 ref YP003413401.1 | gi 662858600 ref NC_013766.2 :1261102-1262115  |
| hypothetical protein LM5578 1296                        | gi 284801543 ref YP003413408.1 | gi 662858600 ref NC_013766.2 :1268963-1269664  |
| uracil-DNA glycosylase                                  | gi 284801547 ref YP003413412.1 | gi 662858600 ref NC_013766.2 :1276961-1277635  |
| ribonuclease HIII                                       | gi 284801548 ref YP003413413.1 | gi 662858600 ref NC_013766.2 :c1278554-1277673 |
| hypothetical protein LM5578 1303                        | gi 284801550 ref YP003413415.1 | gi 662858600 ref NC_013766.2 :1279016-1279558  |
| hypothetical protein LM5578 1304                        | gi 284801551 ref YP003413416.1 | gi 662858600 ref NC_013766.2 :1279651-1281363  |
| recombination and DNA strand exchange inhibitor protein | gi 284801552 ref YP003413417.1 | gi 662858600 ref NC_013766.2 :1281386-1283743  |
| aspartate kinase                                        | gi 284801555 ref YP003413420.1 | gi 662858600 ref NC_013766.2 :1286211-1287425  |
| hypothetical protein LM5578 1313                        | gi 284801560 ref YP003413425.1 | gi 662858600 ref NC_013766.2 :1290334-1290858  |
| hypothetical protein LM5578 1376                        | gi 284801623 ref YP003413488.1 | gi 662858600 ref NC_013766.2 :1336156-1337514  |
| hypothetical protein LM5578 1385                        | gi 284801632 ref YP003413497.1 | gi 662858600 ref NC_013766.2 :c1343718-1342513 |
| hypothetical protein LM5578 1386                        | gi 284801633 ref YP003413498.1 | gi 662858600 ref NC_013766.2 :1343923-1344582  |

|                                            |                                |                                                |
|--------------------------------------------|--------------------------------|------------------------------------------------|
| hypothetical protein LM5578 1392           | gi 284801639 ref YP003413504.1 | gi 662858600 ref NC_013766.2 :c1348743-1347097 |
| gamma-glutamyl kinase                      | gi 284801645 ref YP003413510.1 | gi 662858600 ref NC_013766.2 :c1354515-1353685 |
| hypothetical protein LM5578 1399           | gi 284801646 ref YP003413511.1 | gi 662858600 ref NC_013766.2 :c1355790-1354651 |
| trigger factor                             | gi 284801652 ref YP003413517.1 | gi 662858600 ref NC_013766.2 :1359282-1360565  |
| ATP-dependent protease ATP-binding subunit | gi 284801653 ref YP003413518.1 | gi 662858600 ref NC_013766.2 :1360750-1362009  |
| hypothetical protein LM5578 1407           | gi 284801654 ref YP003413519.1 | gi 662858600 ref NC_013766.2 :1362128-1362694  |
| hypothetical protein LM5578 1408           | gi 284801655 ref YP003413520.1 | gi 662858600 ref NC_013766.2 :1362729-1363298  |
| ribosomal biogenesis GTPase                | gi 284801657 ref YP003413522.1 | gi 662858600 ref NC_013766.2 :1363952-1364815  |
| DNA topoisomerase I                        | gi 284801660 ref YP003413525.1 | gi 662858600 ref NC_013766.2 :1366863-1368941  |
| hypothetical protein LM5578 1415           | gi 284801662 ref YP003413527.1 | gi 662858600 ref NC_013766.2 :1370591-1371493  |
| ATP-dependent protease peptidase subunit   | gi 284801663 ref YP003413528.1 | gi 662858600 ref NC_013766.2 :1371514-1372053  |
| transcriptional repressor CodY             | gi 284801665 ref YP003413530.1 | gi 662858600 ref NC_013766.2 :1373497-1374276  |
| hypothetical protein LM5578 1421           | gi 284801668 ref YP003413533.1 | gi 662858600 ref NC_013766.2 :1375135-1376007  |
| DNA topoisomerase IV subunit A             | gi 284801672 ref YP003413537.1 | gi 662858600 ref NC_013766.2 :1379355-1381814  |
| hypothetical protein LM5578 1428           | gi 284801675 ref YP003413540.1 | gi 662858600 ref NC_013766.2 :1384756-1386552  |

|                                  |                                |                                                |
|----------------------------------|--------------------------------|------------------------------------------------|
| hypothetical protein LM5578 1431 | gi 284801678 ref YP003413543.1 | gi 662858600 ref NC_013766.2 :1389598-1391274  |
| hypothetical protein LM5578 1432 | gi 284801679 ref YP003413544.1 | gi 662858600 ref NC_013766.2 :1391400-1392317  |
| hypothetical protein LM5578 1434 | gi 284801681 ref YP003413546.1 | gi 662858600 ref NC_013766.2 :1392778-1394007  |
| hypothetical protein LM5578 1435 | gi 284801682 ref YP003413547.1 | gi 662858600 ref NC_013766.2 :1394000-1395226  |
| hypothetical protein LM5578 1437 | gi 284801684 ref YP003413549.1 | gi 662858600 ref NC_013766.2 :1395868-1397202  |
| LexA repressor                   | gi 284801687 ref YP003413552.1 | gi 662858600 ref NC_013766.2 :c1399850-1399236 |
| hypothetical protein LM5578 1450 | gi 284801696 ref YP003413561.1 | gi 662858600 ref NC_013766.2 :c1407931-1406732 |
| hypothetical protein LM5578 1452 | gi 284801698 ref YP003413563.1 | gi 662858600 ref NC_013766.2 :1408582-1409310  |
| hypothetical protein LM5578 1453 | gi 284801699 ref YP003413564.1 | gi 662858600 ref NC_013766.2 :1409310-1409867  |
| hypothetical protein LM5578 1457 | gi 284801703 ref YP003413568.1 | gi 662858600 ref NC_013766.2 :1412828-1414090  |
| prolyl-tRNA synthetase           | gi 284801704 ref YP003413569.1 | gi 662858600 ref NC_013766.2 :1414130-1415836  |
| hypothetical protein LM5578 1467 | gi 284801713 ref YP003413578.1 | gi 662858600 ref NC_013766.2 :1425761-1426675  |
| hypothetical protein LM5578 1468 | gi 284801714 ref YP003413579.1 | gi 662858600 ref NC_013766.2 :1426745-1427689  |
| hypothetical protein LM5578 1471 | gi 284801717 ref YP003413582.1 | gi 662858600 ref NC_013766.2 :c1431596-1430556 |
| hypothetical protein LM5578 1475 | gi 284801721 ref YP003413586.1 | gi 662858600 ref NC_013766.2 :1433023-1433562  |

|                                                   |                                |                                               |
|---------------------------------------------------|--------------------------------|-----------------------------------------------|
| hypothetical protein LM5578 1476                  | gi 284801722 ref YP003413587.1 | gi 662858600 ref NC_013766.2 :1433661-1435199 |
| hypothetical protein LM5578 1478                  | gi 284801724 ref YP003413589.1 | gi 662858600 ref NC_013766.2 :1435449-1436417 |
| hypothetical protein LM5578 1479                  | gi 284801725 ref YP003413590.1 | gi 662858600 ref NC_013766.2 :1436551-1437642 |
| glycine cleavage system aminomethyltransferase T  | gi 284801733 ref YP003413598.1 | gi 662858600 ref NC_013766.2 :1441941-1443095 |
| hypothetical protein LM5578 1493                  | gi 284801739 ref YP003413604.1 | gi 662858600 ref NC_013766.2 :1447832-1448893 |
| elongation factor P                               | gi 284801740 ref YP003413605.1 | gi 662858600 ref NC_013766.2 :1448996-1449553 |
| hypothetical protein LM5578 1495                  | gi 284801741 ref YP003413606.1 | gi 662858600 ref NC_013766.2 :1449712-1450179 |
| acetyl-CoA carboxylase biotin carboxylase subunit | gi 284801742 ref YP003413607.1 | gi 662858600 ref NC_013766.2 :1450193-1451557 |
| hypothetical protein LM5578 1499                  | gi 284801745 ref YP003413610.1 | gi 662858600 ref NC_013766.2 :1452481-1453335 |
| exodeoxyribonuclease VII large subunit            | gi 284801746 ref YP003413611.1 | gi 662858600 ref NC_013766.2 :1453354-1454706 |
| hypothetical protein LM5578 1502                  | gi 284801748 ref YP003413613.1 | gi 662858600 ref NC_013766.2 :1454926-1455807 |
| 1-deoxy-D-xylulose-5-phosphate synthase           | gi 284801750 ref YP003413615.1 | gi 662858600 ref NC_013766.2 :1456421-1458202 |
| hypothetical protein LM5578 1505                  | gi 284801751 ref YP003413616.1 | gi 662858600 ref NC_013766.2 :1458199-1459023 |
| DNA repair and genetic recombination              | gi 284801753 ref YP003413618.1 | gi 662858600 ref NC_013766.2 :1459686-1461377 |
| hypothetical protein LM5578 1508                  | gi 284801754 ref YP003413619.1 | gi 662858600 ref NC_013766.2 :1461506-1462372 |

|                                              |                                |                                                |
|----------------------------------------------|--------------------------------|------------------------------------------------|
| dihydrolipoamide dehydrogenase               | gi 284801756 ref YP003413621.1 | gi 662858600 ref NC_013766.2 :1463592-1465019  |
| 6-phosphogluconate dehydrogenase             | gi 284801762 ref YP003413627.1 | gi 662858600 ref NC_013766.2 :1469933-1471351  |
| two-component response regulator             | gi 284801763 ref YP003413628.1 | gi 662858600 ref NC_013766.2 :1471542-1472222  |
| two-component sensor histidine kinase        | gi 284801764 ref YP003413629.1 | gi 662858600 ref NC_013766.2 :1472219-1473670  |
| hypothetical protein LM5578 1525             | gi 284801770 ref YP003413635.1 | gi 662858600 ref NC_013766.2 :c1477846-1476851 |
| hypothetical protein LM5578 1526             | gi 284801771 ref YP003413636.1 | gi 662858600 ref NC_013766.2 :1478062-1478988  |
| hypothetical protein LM5578 1527             | gi 284801772 ref YP003413637.1 | gi 662858600 ref NC_013766.2 :1479140-1481413  |
| pyrroline-5-carboxylate reductase            | gi 284801773 ref YP003413638.1 | gi 662858600 ref NC_013766.2 :c1482286-1481447 |
| CD4+ T cell-stimulating antigen, lipoprotein | gi 284801774 ref YP003413639.1 | gi 662858600 ref NC_013766.2 :1482638-1483711  |
| hypothetical protein LM5578 1531             | gi 284801776 ref YP003413641.1 | gi 662858600 ref NC_013766.2 :1485678-1486730  |
| hypothetical protein LM5578 1532             | gi 284801777 ref YP003413642.1 | gi 662858600 ref NC_013766.2 :1486727-1487677  |
| hypothetical protein LM5578 1533             | gi 284801778 ref YP003413643.1 | gi 662858600 ref NC_013766.2 :1487795-1489087  |
| hypothetical protein LM5578 1534             | gi 284801779 ref YP003413644.1 | gi 662858600 ref NC_013766.2 :1489068-1490354  |
| hypothetical protein LM5578 1535             | gi 284801780 ref YP003413645.1 | gi 662858600 ref NC_013766.2 :1490446-1491177  |
| hypothetical protein LM5578 1536             | gi 284801781 ref YP003413646.1 | gi 662858600 ref NC_013766.2 :1491228-1492157  |

|                                          |                                |                                                |
|------------------------------------------|--------------------------------|------------------------------------------------|
| hypothetical protein LM5578 1537         | gi 284801782 ref YP003413647.1 | gi 662858600 ref NC_013766.2 :1492247-1492825  |
| recombinase A                            | gi 284801784 ref YP003413649.1 | gi 662858600 ref NC_013766.2 :1494411-1495457  |
| phosphodiesterase                        | gi 284801785 ref YP003413650.1 | gi 662858600 ref NC_013766.2 :1495758-1497320  |
| hypothetical protein LM5578 1542         | gi 284801787 ref YP003413652.1 | gi 662858600 ref NC_013766.2 :1497937-1498740  |
| DNA mismatch repair protein              | gi 284801789 ref YP003413654.1 | gi 662858600 ref NC_013766.2 :1499229-1501811  |
| DNA mismatch repair protein              | gi 284801790 ref YP003413655.1 | gi 662858600 ref NC_013766.2 :1501831-1503642  |
| pyruvate formate-lyase                   | gi 284801792 ref YP003413657.1 | gi 662858600 ref NC_013766.2 :1504633-1506864  |
| pyruvate-formate lyase activating enzyme | gi 284801793 ref YP003413658.1 | gi 662858600 ref NC_013766.2 :1506941-1507687  |
| hypothetical protein LM5578 1549         | gi 284801794 ref YP003413659.1 | gi 662858600 ref NC_013766.2 :c1508252-1507722 |
| peptidoglycan binding protein            | gi 284801799 ref YP003413664.1 | gi 662858600 ref NC_013766.2 :c1512685-1511366 |
| hypothetical protein LM5578 1556         | gi 284801801 ref YP003413666.1 | gi 662858600 ref NC_013766.2 :1514190-1515356  |
| hypothetical protein LM5578 1558         | gi 284801803 ref YP003413668.1 | gi 662858600 ref NC_013766.2 :c1517293-1516049 |
| hypothetical protein LM5578 1559         | gi 284801804 ref YP003413669.1 | gi 662858600 ref NC_013766.2 :c1518580-1517312 |
| hypothetical protein LM5578 1560         | gi 284801805 ref YP003413670.1 | gi 662858600 ref NC_013766.2 :c1519681-1518644 |
| hypothetical protein LM5578 1562         | gi 284801807 ref YP003413672.1 | gi 662858600 ref NC_013766.2 :1520810-1521796  |

|                                  |                                |                                                |
|----------------------------------|--------------------------------|------------------------------------------------|
| hypothetical protein LM5578 1563 | gi 284801808 ref YP003413673.1 | gi 662858600 ref NC_013766.2 :1521793-1523307  |
| hypothetical protein LM5578 1564 | gi 284801809 ref YP003413674.1 | gi 662858600 ref NC_013766.2 :c1524173-1523343 |
| manganese transport protein MntH | gi 284801810 ref YP003413675.1 | gi 662858600 ref NC_013766.2 :c1525658-1524312 |
| hypothetical protein LM5578 1566 | gi 284801811 ref YP003413676.1 | gi 662858600 ref NC_013766.2 :c1526442-1525771 |
| hypothetical protein LM5578 1567 | gi 284801812 ref YP003413677.1 | gi 662858600 ref NC_013766.2 :c1527383-1526457 |
| hypothetical protein LM5578 1568 | gi 284801813 ref YP003413678.1 | gi 662858600 ref NC_013766.2 :c1528041-1527385 |
| hypothetical protein LM5578 1570 | gi 284801815 ref YP003413680.1 | gi 662858600 ref NC_013766.2 :c1530091-1529531 |
| hypothetical protein LM5578 1573 | gi 284801818 ref YP003413683.1 | gi 662858600 ref NC_013766.2 :c1533153-1532503 |
| hypothetical protein LM5578 1574 | gi 284801819 ref YP003413684.1 | gi 662858600 ref NC_013766.2 :c1534546-1533206 |
| hypothetical protein LM5578 1575 | gi 284801820 ref YP003413685.1 | gi 662858600 ref NC_013766.2 :c1536302-1534635 |
| dihydrodipicolinate synthase     | gi 284801821 ref YP003413686.1 | gi 662858600 ref NC_013766.2 :c1537203-1536322 |
| aspartate kinase I               | gi 284801822 ref YP003413687.1 | gi 662858600 ref NC_013766.2 :c1538429-1537218 |
| hypothetical protein LM5578 1578 | gi 284801823 ref YP003413688.1 | gi 662858600 ref NC_013766.2 :c1539484-1538441 |
| hypothetical protein LM5578 1580 | gi 284801825 ref YP003413690.1 | gi 662858600 ref NC_013766.2 :c1541847-1539682 |
| hypothetical protein LM5578 1582 | gi 284801827 ref YP003413692.1 | gi 662858600 ref NC_013766.2 :1542886-1543686  |



|                                                                    |                                |                                                |
|--------------------------------------------------------------------|--------------------------------|------------------------------------------------|
| hypothetical protein LM5578 1584                                   | gi 284801829 ref YP003413694.1 | gi 662858600 ref NC_013766.2 :1544941-1545648  |
| metal (zinc) transport protein (ABC transporter, permease protein) | gi 284801833 ref YP003413698.1 | gi 662858600 ref NC_013766.2 :c1548352-1547474 |
| endonuclease IV                                                    | gi 284801836 ref YP003413701.1 | gi 662858600 ref NC_013766.2 :c1551078-1550185 |
| hypothetical protein LM5578 1592                                   | gi 284801837 ref YP003413702.1 | gi 662858600 ref NC_013766.2 :c1552400-1551093 |
| hypothetical protein LM5578 1594                                   | gi 284801839 ref YP003413704.1 | gi 662858600 ref NC_013766.2 :c1554708-1553587 |
| hypothetical protein LM5578 1595                                   | gi 284801840 ref YP003413705.1 | gi 662858600 ref NC_013766.2 :c1555409-1554705 |
| RNA polymerase sigma factor RpoD                                   | gi 284801841 ref YP003413706.1 | gi 662858600 ref NC_013766.2 :c1556601-1555477 |
| DNA primase                                                        | gi 284801842 ref YP003413707.1 | gi 662858600 ref NC_013766.2 :c1558576-1556696 |
| hypothetical protein LM5578 1599                                   | gi 284801844 ref YP003413709.1 | gi 662858600 ref NC_013766.2 :c1560050-1559226 |
| DNA repair protein RecO                                            | gi 284801847 ref YP003413712.1 | gi 662858600 ref NC_013766.2 :c1564082-1563315 |
| hypothetical protein LM5578 1603                                   | gi 284801848 ref YP003413713.1 | gi 662858600 ref NC_013766.2 :1564218-1564847  |
| GTP-binding protein Era                                            | gi 284801849 ref YP003413714.1 | gi 662858600 ref NC_013766.2 :c1565801-1564896 |
| putative metalloprotease                                           | gi 284801852 ref YP003413717.1 | gi 662858600 ref NC_013766.2 :c1567076-1566591 |
| hypothetical protein LM5578 1609                                   | gi 284801854 ref YP003413719.1 | gi 662858600 ref NC_013766.2 :c1570224-1569265 |
| heat shock protein DnaJ                                            | gi 284801859 ref YP            | gi 662858600 ref NC_013766.2 :c1574167-1573034 |

|                                                       |                                |                                                |
|-------------------------------------------------------|--------------------------------|------------------------------------------------|
|                                                       | 003413724.1                    |                                                |
| class I heat-shock protein (molecular chaperone) DnaK | gi 284801860 ref YP003413725.1 | gi 662858600 ref NC_013766.2 :c1576150-1574309 |
| heat shock protein GrpE                               | gi 284801861 ref YP003413726.1 | gi 662858600 ref NC_013766.2 :c1576759-1576184 |
| heat-inducible transcription repressor                | gi 284801862 ref YP003413727.1 | gi 662858600 ref NC_013766.2 :c1577838-1576801 |
| DNA polymerase III subunit delta                      | gi 284801868 ref YP003413733.1 | gi 662858600 ref NC_013766.2 :c1584285-1583254 |
| hypothetical protein LM5578 1625                      | gi 284801870 ref YP003413735.1 | gi 662858600 ref NC_013766.2 :c1587170-1586610 |
| hypothetical protein LM5578 1626                      | gi 284801871 ref YP003413736.1 | gi 662858600 ref NC_013766.2 :c1587844-1587242 |
| hypothetical protein LM5578 1627                      | gi 284801872 ref YP003413737.1 | gi 662858600 ref NC_013766.2 :c1588678-1587947 |
| hypothetical protein LM5578 1632                      | gi 284801877 ref YP003413742.1 | gi 662858600 ref NC_013766.2 :c1591351-1590530 |
| hypothetical protein LM5578 1634                      | gi 284801879 ref YP003413744.1 | gi 662858600 ref NC_013766.2 :c1592989-1592468 |
| hypothetical protein LM5578 1639                      | gi 284801884 ref YP003413749.1 | gi 662858600 ref NC_013766.2 :c1597641-1597012 |
| uridine kinase                                        | gi 284801887 ref YP003413752.1 | gi 662858600 ref NC_013766.2 :c1598991-1598362 |
| hypothetical protein LM5578 1644                      | gi 284801889 ref YP003413754.1 | gi 662858600 ref NC_013766.2 :c1600788-1599718 |
| hypothetical protein LM5578 1645                      | gi 284801890 ref YP003413755.1 | gi 662858600 ref NC_013766.2 :1600991-1601617  |
| alanyl-tRNA synthetase                                | gi 284801894 ref YP003413759.1 | gi 662858600 ref NC_013766.2 :c1605255-1602757 |

|                                                       |                                |                                                |
|-------------------------------------------------------|--------------------------------|------------------------------------------------|
| hypothetical protein LM5578 1650                      | gi 284801895 ref YP003413760.1 | gi 662858600 ref NC_013766.2 :c1606398-1605703 |
| hypothetical protein LM5578 1652                      | gi 284801897 ref YP003413762.1 | gi 662858600 ref NC_013766.2 :1608079-1608765  |
| hypothetical protein LM5578 1653                      | gi 284801898 ref YP003413763.1 | gi 662858600 ref NC_013766.2 :1608762-1610201  |
| hypothetical protein LM5578 1655                      | gi 284801900 ref YP003413765.1 | gi 662858600 ref NC_013766.2 :c1613335-1612667 |
| hypothetical protein LM5578 1657                      | gi 284801902 ref YP003413767.1 | gi 662858600 ref NC_013766.2 :c1615319-1614204 |
| hypothetical protein LM5578 1658                      | gi 284801903 ref YP003413768.1 | gi 662858600 ref NC_013766.2 :c1616486-1615338 |
| recombination factor protein RarA                     | gi 284801904 ref YP003413769.1 | gi 662858600 ref NC_013766.2 :c1618149-1616866 |
| hypothetical protein LM5578 1661                      | gi 284801906 ref YP003413771.1 | gi 662858600 ref NC_013766.2 :1618965-1620170  |
| hypothetical protein LM5578 1666                      | gi 284801911 ref YP003413776.1 | gi 662858600 ref NC_013766.2 :1624624-1625907  |
| hypothetical protein LM5578 1668                      | gi 284801913 ref YP003413778.1 | gi 662858600 ref NC_013766.2 :c1628628-1626412 |
| hypothetical protein LM5578 1670                      | gi 284801915 ref YP003413780.1 | gi 662858600 ref NC_013766.2 :c1631780-1629345 |
| bifunctional preprotein translocase subunit SecD/SecF | gi 284801917 ref YP003413782.1 | gi 662858600 ref NC_013766.2 :c1634506-1632242 |
| queuine tRNA-ribosyltransferase                       | gi 284801920 ref YP003413785.1 | gi 662858600 ref NC_013766.2 :c1636542-1635403 |
| hypothetical protein LM5578 1676                      | gi 284801921 ref YP003413786.1 | gi 662858600 ref NC_013766.2 :c1637657-1636629 |
| Holliday junction DNA helicase B                      | gi 284801922 ref YP003413787.1 | gi 662858600 ref NC_013766.2 :c1638668-1637661 |

|                                           |                                |                                                |
|-------------------------------------------|--------------------------------|------------------------------------------------|
| hypothetical protein LM5578 1678          | gi 284801923 ref YP003413788.1 | gi 662858600 ref NC_013766.2 :c1639289-1638684 |
| prephenate dehydratase                    | gi 284801926 ref YP003413791.1 | gi 662858600 ref NC_013766.2 :c1642123-1641254 |
| GTPase ObgE                               | gi 284801927 ref YP003413792.1 | gi 662858600 ref NC_013766.2 :c1643458-1642169 |
| glycerol kinase                           | gi 284801928 ref YP003413793.1 | gi 662858600 ref NC_013766.2 :c1645111-1643618 |
| hypothetical protein LM5578 1684          | gi 284801929 ref YP003413794.1 | gi 662858600 ref NC_013766.2 :c1646004-1645186 |
| hypothetical protein LM5578 1688          | gi 284801933 ref YP003413798.1 | gi 662858600 ref NC_013766.2 :c1648837-1647476 |
| septum formation inhibitor                | gi 284801935 ref YP003413800.1 | gi 662858600 ref NC_013766.2 :c1650369-1649692 |
| hypothetical protein LM5578 1691          | gi 284801936 ref YP003413801.1 | gi 662858600 ref NC_013766.2 :c1651065-1650547 |
| hypothetical protein LM5578 1692          | gi 284801937 ref YP003413802.1 | gi 662858600 ref NC_013766.2 :c1651955-1651068 |
| hypothetical protein LM5578 1693          | gi 284801938 ref YP003413803.1 | gi 662858600 ref NC_013766.2 :c1653054-1652041 |
| DNA repair protein RadC                   | gi 284801939 ref YP003413804.1 | gi 662858600 ref NC_013766.2 :c1654180-1653506 |
| valyl-tRNA synthetase                     | gi 284801943 ref YP003413808.1 | gi 662858600 ref NC_013766.2 :c1659116-1656465 |
| glutamate-1-semialdehyde aminotransferase | gi 284801944 ref YP003413809.1 | gi 662858600 ref NC_013766.2 :c1660728-1659439 |
| delta-aminolevulinic acid dehydratase     | gi 284801945 ref YP003413810.1 | gi 662858600 ref NC_013766.2 :c1661715-1660741 |
| uroporphyrinogen-III synthase             | gi 284801946 ref YP003413811.1 | gi 662858600 ref NC_013766.2 :c1662434-1661712 |

|                                                                             |                                |                                                |
|-----------------------------------------------------------------------------|--------------------------------|------------------------------------------------|
| porphobilinogen deaminase                                                   | gi 284801947 ref YP003413812.1 | gi 662858600 ref NC_013766.2 :c1663360-1662431 |
| glutamyl-tRNA reductase                                                     | gi 284801948 ref YP003413813.1 | gi 662858600 ref NC_013766.2 :c1664671-1663364 |
| GTPase EngB                                                                 | gi 284801949 ref YP003413814.1 | gi 662858600 ref NC_013766.2 :c1665383-1664799 |
| hypothetical protein LM5578 1709                                            | gi 284801954 ref YP003413819.1 | gi 662858600 ref NC_013766.2 :c1671279-1670620 |
| hypothetical protein LM5578 1710                                            | gi 284801955 ref YP003413820.1 | gi 662858600 ref NC_013766.2 :c1672060-1671239 |
| methylcitrate synthase                                                      | gi 284801958 ref YP003413823.1 | gi 662858600 ref NC_013766.2 :c1677280-1676159 |
| pyruvate kinase                                                             | gi 284801961 ref YP003413826.1 | gi 662858600 ref NC_013766.2 :c1680186-1678429 |
| 6-phosphofructokinase                                                       | gi 284801962 ref YP003413827.1 | gi 662858600 ref NC_013766.2 :c1681428-1680469 |
| acetyl-CoA carboxylase carboxyltransferase subunit alpha                    | gi 284801963 ref YP003413828.1 | gi 662858600 ref NC_013766.2 :c1682668-1681712 |
| hypothetical protein LM5578 1721                                            | gi 284801966 ref YP003413831.1 | gi 662858600 ref NC_013766.2 :c1688146-1687208 |
| hypothetical protein LM5578 1725                                            | gi 284801970 ref YP003413835.1 | gi 662858600 ref NC_013766.2 :c1692606-1691494 |
| inorganic polyphosphate/ATP-NAD kinase                                      | gi 284801978 ref YP003413843.1 | gi 662858600 ref NC_013766.2 :1698076-1698879  |
| ornithine carbamoyltransferase                                              | gi 284801979 ref YP003413844.1 | gi 662858600 ref NC_013766.2 :c1699861-1698911 |
| bifunctional ornithine acetyltransferase/N-acetylglutamate synthase protein | gi 284801982 ref YP003413847.1 | gi 662858600 ref NC_013766.2 :c1702976-1701780 |
| N-acetyl-gamma-glutamyl-phosphate                                           | gi 284801983 ref YP            | gi 662858600 ref NC_013766.2 :c1704023-1702992 |

|                                         |                                |                                                |
|-----------------------------------------|--------------------------------|------------------------------------------------|
| reductase                               | 003413848.1                    |                                                |
| hypothetical protein LM5578 1739        | gi 284801984 ref YP003413849.1 | gi 662858600 ref NC_013766.2 :c1705408-1704197 |
| hypothetical protein LM5578 1740        | gi 284801985 ref YP003413850.1 | gi 662858600 ref NC_013766.2 :c1706549-1705410 |
| septation ring formation regulator EzrA | gi 284801986 ref YP003413851.1 | gi 662858600 ref NC_013766.2 :c1708391-1706676 |
| 30S ribosomal protein S4                | gi 284801988 ref YP003413853.1 | gi 662858600 ref NC_013766.2 :1709384-1709986  |
| hypothetical protein LM5578 1748        | gi 284801993 ref YP003413858.1 | gi 662858600 ref NC_013766.2 :c1716201-1715677 |
| hypothetical protein LM5578 1755        | gi 284802000 ref YP003413865.1 | gi 662858600 ref NC_013766.2 :c1724498-1723698 |
| hypothetical protein LM5578 1758        | gi 284802003 ref YP003413868.1 | gi 662858600 ref NC_013766.2 :c1726240-1725167 |
| hypothetical protein LM5578 1761        | gi 284802006 ref YP003413871.1 | gi 662858600 ref NC_013766.2 :c1728020-1727169 |
| tRNA (guanine-N(7))-methyltransferase   | gi 284802007 ref YP003413872.1 | gi 662858600 ref NC_013766.2 :c1728725-1728081 |
| hypothetical protein LM5578 1763        | gi 284802008 ref YP003413873.1 | gi 662858600 ref NC_013766.2 :c1729514-1728732 |
| D-amino acid aminotransferase           | gi 284802011 ref YP003413876.1 | gi 662858600 ref NC_013766.2 :c1732723-1731854 |
| dipeptidase PepV                        | gi 284802012 ref YP003413877.1 | gi 662858600 ref NC_013766.2 :c1734248-1732836 |
| hypothetical protein LM5578 1769        | gi 284802014 ref YP003413879.1 | gi 662858600 ref NC_013766.2 :1734841-1735671  |
| hypothetical protein LM5578 1770        | gi 284802015 ref YP003413880.1 | gi 662858600 ref NC_013766.2 :c1736363-1735710 |

|                                                     |                                |                                                |
|-----------------------------------------------------|--------------------------------|------------------------------------------------|
| hypothetical protein LM5578 1771                    | gi 284802016 ref YP003413881.1 | gi 662858600 ref NC_013766.2 :c1737986-1736373 |
| tryptophan synthase subunit alpha                   | gi 284802019 ref YP003413884.1 | gi 662858600 ref NC_013766.2 :c1741076-1740303 |
| tryptophan synthase subunit beta                    | gi 284802020 ref YP003413885.1 | gi 662858600 ref NC_013766.2 :c1742271-1741069 |
| phosphoribosyl anthranilate isomerase               | gi 284802021 ref YP003413886.1 | gi 662858600 ref NC_013766.2 :c1742882-1742274 |
| indole-3-glycerol-phosphate synthase                | gi 284802022 ref YP003413887.1 | gi 662858600 ref NC_013766.2 :c1743637-1742879 |
| anthranilate phosphoribosyltransferase              | gi 284802023 ref YP003413888.1 | gi 662858600 ref NC_013766.2 :c1744653-1743634 |
| anthranilate synthase component II                  | gi 284802024 ref YP003413889.1 | gi 662858600 ref NC_013766.2 :c1745230-1744625 |
| anthranilate synthase component I                   | gi 284802025 ref YP003413890.1 | gi 662858600 ref NC_013766.2 :c1746591-1745227 |
| bifunctional acetaldehyde-CoA/alcohol dehydrogenase | gi 284802026 ref YP003413891.1 | gi 662858600 ref NC_013766.2 :1747675-1750275  |
| hypothetical protein LM5578 1783                    | gi 284802028 ref YP003413893.1 | gi 662858600 ref NC_013766.2 :1750910-1751830  |
| hypothetical protein LM5578 1784                    | gi 284802029 ref YP003413894.1 | gi 662858600 ref NC_013766.2 :1751827-1752894  |
| aconitate hydratase                                 | gi 284802033 ref YP003413898.1 | gi 662858600 ref NC_013766.2 :c1757678-1754829 |
| hypothetical protein LM5578 1794                    | gi 284802039 ref YP003413904.1 | gi 662858600 ref NC_013766.2 :1766546-1767154  |
| hypothetical protein LM5578 1796                    | gi 284802041 ref YP003413906.1 | gi 662858600 ref NC_013766.2 :c1768257-1767742 |
| elongation factor Ts                                | gi 284802049 ref YP003413914.1 | gi 662858600 ref NC_013766.2 :c1777354-1776470 |

|                                                                       |                                |                                                |
|-----------------------------------------------------------------------|--------------------------------|------------------------------------------------|
| 30S ribosomal protein S2                                              | gi 284802050 ref YP003413915.1 | gi 662858600 ref NC_013766.2 :c1778183-1777434 |
| hypothetical protein LM5578 1809                                      | gi 284802054 ref YP003413919.1 | gi 662858600 ref NC_013766.2 :1783104-1783679  |
| hypothetical protein LM5578 1814                                      | gi 284802059 ref YP003413924.1 | gi 662858600 ref NC_013766.2 :c1793810-1792902 |
| hypothetical protein LM5578 1816                                      | gi 284802061 ref YP003413926.1 | gi 662858600 ref NC_013766.2 :c1794593-1794120 |
| hypothetical protein LM5578 1821                                      | gi 284802066 ref YP003413931.1 | gi 662858600 ref NC_013766.2 :c1799122-1798295 |
| 1,4-dihydroxy-2-naphthoate octaprenyltransferase                      | gi 284802069 ref YP003413934.1 | gi 662858600 ref NC_013766.2 :1802426-1803364  |
| cystathionine beta-lyase                                              | gi 284802071 ref YP003413936.1 | gi 662858600 ref NC_013766.2 :c1806419-1805247 |
| hypothetical protein LM5578 1827                                      | gi 284802072 ref YP003413937.1 | gi 662858600 ref NC_013766.2 :c1807536-1806412 |
| 5-methyltetrahydropteroyltriglutamate--homocysteine methyltransferase | gi 284802073 ref YP003413938.1 | gi 662858600 ref NC_013766.2 :c1809855-1807558 |
| hypothetical protein LM5578 1829                                      | gi 284802074 ref YP003413939.1 | gi 662858600 ref NC_013766.2 :c1811320-1810145 |
| hypothetical protein LM5578 1831                                      | gi 284802076 ref YP003413941.1 | gi 662858600 ref NC_013766.2 :c1820204-1819263 |
| glutamate-1-semialdehyde aminotransferase                             | gi 284802077 ref YP003413942.1 | gi 662858600 ref NC_013766.2 :1820349-1821647  |
| hypothetical protein LM5578 1837                                      | gi 284802082 ref YP003413947.1 | gi 662858600 ref NC_013766.2 :1825614-1826594  |
| hypothetical protein LM5578 1842                                      | gi 284802087 ref YP003413952.1 | gi 662858600 ref NC_013766.2 :c1831761-1829164 |



|                                                           |                                |                                                |
|-----------------------------------------------------------|--------------------------------|------------------------------------------------|
| hypothetical protein LM5578 1843                          | gi 284802088 ref YP003413953.1 | gi 662858600 ref NC_013766.2 :c1832462-1831788 |
| hypothetical protein LM5578 1845                          | gi 284802090 ref YP003413955.1 | gi 662858600 ref NC_013766.2 :c1834221-1833679 |
| hypothetical protein LM5578 1846                          | gi 284802091 ref YP003413956.1 | gi 662858600 ref NC_013766.2 :1834411-1835313  |
| hypothetical protein LM5578 1907                          | gi 284802152 ref YP003414017.1 | gi 662858600 ref NC_013766.2 :c1889794-1888925 |
| methionine aminopeptidase                                 | gi 284802155 ref YP003414020.1 | gi 662858600 ref NC_013766.2 :c1891811-1891053 |
| hypothetical protein LM5578 1913                          | gi 284802158 ref YP003414023.1 | gi 662858600 ref NC_013766.2 :1893919-1895178  |
| hypothetical protein LM5578 1918                          | gi 284802162 ref YP003414027.1 | gi 662858600 ref NC_013766.2 :c1899261-1898173 |
| hypothetical protein LM5578 1926                          | gi 284802170 ref YP003414035.1 | gi 662858600 ref NC_013766.2 :c1907214-1906231 |
| transcription activator of glutamate synthase operon GltC | gi 284802179 ref YP003414044.1 | gi 662858600 ref NC_013766.2 :1923505-1924392  |
| hypothetical protein LM5578 1938                          | gi 284802182 ref YP003414047.1 | gi 662858600 ref NC_013766.2 :c1926922-1926107 |
| hypothetical protein LM5578 1940                          | gi 284802184 ref YP003414049.1 | gi 662858600 ref NC_013766.2 :c1928247-1927582 |
| hypothetical protein LM5578 1941                          | gi 284802185 ref YP003414050.1 | gi 662858600 ref NC_013766.2 :c1929661-1928621 |
| hypothetical protein LM5578 1942                          | gi 284802186 ref YP003414051.1 | gi 662858600 ref NC_013766.2 :c1931422-1929683 |
| hypothetical protein LM5578 1944                          | gi 284802188 ref YP003414053.1 | gi 662858600 ref NC_013766.2 :c1932796-1931921 |
| hypothetical protein LM5578 1945                          | gi 284802189 ref YP003414054.1 | gi 662858600 ref NC_013766.2 :c1933544-1932867 |

|                                                                                           |                                |                                                |
|-------------------------------------------------------------------------------------------|--------------------------------|------------------------------------------------|
| hypothetical protein LM5578 1949                                                          | gi 284802193 ref YP003414058.1 | gi 662858600 ref NC_013766.2 :1937204-1937677  |
| hypothetical protein LM5578 1950                                                          | gi 284802194 ref YP003414059.1 | gi 662858600 ref NC_013766.2 :c1938262-1937708 |
| hypothetical protein LM5578 1951                                                          | gi 284802195 ref YP003414060.1 | gi 662858600 ref NC_013766.2 :c1939958-1938597 |
| putative lipid kinase                                                                     | gi 284802197 ref YP003414062.1 | gi 662858600 ref NC_013766.2 :c1941817-1940885 |
| aspartyl/glutamyl-tRNA amidotransferase subunit B                                         | gi 284802198 ref YP003414063.1 | gi 662858600 ref NC_013766.2 :c1943388-1941958 |
| hypothetical protein LM5578 1957                                                          | gi 284802201 ref YP003414066.1 | gi 662858600 ref NC_013766.2 :c1946408-1945293 |
| NAD-dependent DNA ligase LigA                                                             | gi 284802202 ref YP003414067.1 | gi 662858600 ref NC_013766.2 :c1948420-1946405 |
| geranylgeranylgeranyl glyceryl phosphate synthase-like protein                            | gi 284802204 ref YP003414069.1 | gi 662858600 ref NC_013766.2 :c1951382-1950705 |
| hypothetical protein LM5578 1961                                                          | gi 284802205 ref YP003414070.1 | gi 662858600 ref NC_013766.2 :1951589-1952944  |
| phosphoribosylamine--glycine ligase                                                       | gi 284802208 ref YP003414073.1 | gi 662858600 ref NC_013766.2 :c1954956-1953694 |
| bifunctional phosphoribosylaminoimidazolecarboxamide formyltransferase/IMP cyclohydrolase | gi 284802209 ref YP003414074.1 | gi 662858600 ref NC_013766.2 :c1956510-1954981 |
| hypothetical protein LM5578 1966                                                          | gi 284802210 ref YP003414075.1 | gi 662858600 ref NC_013766.2 :c1957082-1956516 |
| phosphoribosylformylglycinamide synthase II                                               | gi 284802213 ref YP003414078.1 | gi 662858600 ref NC_013766.2 :c1961778-1959559 |
| phosphoribosylaminoimidazole-succinocarboxamide synthase                                  | gi 284802216 ref YP003414081.1 | gi 662858600 ref NC_013766.2 :c1963428-1962715 |
| adenylosuccinate lyase                                                                    | gi 284802217 ref YP            | gi 662858600 ref NC_013766.2 :c1964801-1963509 |

|                                                         |                                |                                                |
|---------------------------------------------------------|--------------------------------|------------------------------------------------|
|                                                         | 003414082.1                    |                                                |
| phosphoribosylaminoimidazole carboxylase ATPase subunit | gi 284802218 ref YP003414083.1 | gi 662858600 ref NC_013766.2 :c1965944-1964820 |
| hypothetical protein LM5578 1977                        | gi 284802221 ref YP003414086.1 | gi 662858600 ref NC_013766.2 :c1973149-1972544 |
| hypothetical protein LM5578 1978                        | gi 284802222 ref YP003414087.1 | gi 662858600 ref NC_013766.2 :1973215-1973988  |
| translation initiation factor IF-3                      | gi 284802229 ref YP003414094.1 | gi 662858600 ref NC_013766.2 :c1978243-1977740 |
| hypothetical protein LM5578 1992                        | gi 284802236 ref YP003414101.1 | gi 662858600 ref NC_013766.2 :1981969-1982685  |
| hypothetical protein LM5578 1994                        | gi 284802238 ref YP003414103.1 | gi 662858600 ref NC_013766.2 :c1983862-1983125 |
| hypothetical protein LM5578 2000                        | gi 284802244 ref YP003414109.1 | gi 662858600 ref NC_013766.2 :c1987928-1986270 |
| hypothetical protein LM5578 2003                        | gi 284802247 ref YP003414112.1 | gi 662858600 ref NC_013766.2 :c1993572-1992220 |
| hypothetical protein LM5578 2006                        | gi 284802250 ref YP003414115.1 | gi 662858600 ref NC_013766.2 :c1998591-1995031 |
| hypothetical protein LM5578 2007                        | gi 284802251 ref YP003414116.1 | gi 662858600 ref NC_013766.2 :c1999303-1998614 |
| fatty acid biosynthesis transcriptional regulator       | gi 284802256 ref YP003414121.1 | gi 662858600 ref NC_013766.2 :c2003121-2002552 |
| hypothetical protein LM5578 2015                        | gi 284802259 ref YP003414124.1 | gi 662858600 ref NC_013766.2 :c2007031-2006369 |
| hypothetical protein LM5578 2016                        | gi 284802260 ref YP003414125.1 | gi 662858600 ref NC_013766.2 :c2008729-2007071 |
| hypothetical protein LM5578 2019                        | gi 284802263 ref YP003414128.1 | gi 662858600 ref NC_013766.2 :c2010336-2009692 |
| ribulose-phosphate 3-epimerase                          | gi 284802264 ref YP            | gi 662858600 ref NC_013766.2 :c2011056-2010400 |

|                                            |                                |                                                |
|--------------------------------------------|--------------------------------|------------------------------------------------|
|                                            | 003414129.1                    |                                                |
| ribosome-associated GTPase                 | gi 284802265 ref YP003414130.1 | gi 662858600 ref NC_013766.2 :c2011934-2011059 |
| hypothetical protein LM5578 2022           | gi 284802266 ref YP003414131.1 | gi 662858600 ref NC_013766.2 :c2013920-2011953 |
| hypothetical protein LM5578 2024           | gi 284802268 ref YP003414133.1 | gi 662858600 ref NC_013766.2 :c2016032-2014698 |
| hypothetical protein LM5578 2029           | gi 284802273 ref YP003414138.1 | gi 662858600 ref NC_013766.2 :c2021560-2020940 |
| hypothetical protein LM5578 2031           | gi 284802275 ref YP003414140.1 | gi 662858600 ref NC_013766.2 :2022608-2024320  |
| short chain dehydrogenase                  | gi 284802276 ref YP003414141.1 | gi 662858600 ref NC_013766.2 :2024408-2025007  |
| orotate phosphoribosyltransferase          | gi 284802277 ref YP003414142.1 | gi 662858600 ref NC_013766.2 :c2025677-2025048 |
| hypothetical protein LM5578 2034           | gi 284802278 ref YP003414143.1 | gi 662858600 ref NC_013766.2 :c2026375-2025674 |
| dihydroorotate dehydrogenase 1B            | gi 284802279 ref YP003414144.1 | gi 662858600 ref NC_013766.2 :c2027286-2026372 |
| hypothetical protein LM5578 2036           | gi 284802280 ref YP003414145.1 | gi 662858600 ref NC_013766.2 :c2028047-2027283 |
| carbamoyl phosphate synthase large subunit | gi 284802281 ref YP003414146.1 | gi 662858600 ref NC_013766.2 :c2031282-2028070 |
| carbamoyl phosphate synthase small subunit | gi 284802282 ref YP003414147.1 | gi 662858600 ref NC_013766.2 :c2032366-2031275 |
| hypothetical protein LM5578 2041           | gi 284802285 ref YP003414150.1 | gi 662858600 ref NC_013766.2 :c2035912-2034626 |
| pyrimidine regulatory protein PyrR         | gi 284802286 ref YP003414151.1 | gi 662858600 ref NC_013766.2 :c2036592-2036041 |

|                                  |                                |                                                |
|----------------------------------|--------------------------------|------------------------------------------------|
| hypothetical protein LM5578 2045 | gi 284802289 ref YP003414154.1 | gi 662858600 ref NC_013766.2 :c2038896-2037985 |
| hypothetical protein LM5578 2049 | gi 284802293 ref YP003414158.1 | gi 662858600 ref NC_013766.2 :c2043217-2042285 |
| hypothetical protein LM5578 2050 | gi 284802294 ref YP003414159.1 | gi 662858600 ref NC_013766.2 :c2044056-2043214 |
| hypothetical protein LM5578 2051 | gi 284802295 ref YP003414160.1 | gi 662858600 ref NC_013766.2 :c2044782-2044060 |
| hypothetical protein LM5578 2053 | gi 284802297 ref YP003414162.1 | gi 662858600 ref NC_013766.2 :c2046884-2045394 |
| hypothetical protein LM5578 2057 | gi 284802301 ref YP003414166.1 | gi 662858600 ref NC_013766.2 :c2050725-2049901 |
| purine nucleoside phosphorylase  | gi 284802302 ref YP003414167.1 | gi 662858600 ref NC_013766.2 :c2051484-2050783 |
| hypothetical protein LM5578 2060 | gi 284802304 ref YP003414169.1 | gi 662858600 ref NC_013766.2 :c2052697-2051792 |
| methionine sulfoxide reductase A | gi 284802306 ref YP003414171.1 | gi 662858600 ref NC_013766.2 :c2053757-2053224 |
| hypothetical protein LM5578 2064 | gi 284802308 ref YP003414173.1 | gi 662858600 ref NC_013766.2 :c2055208-2054423 |
| hypothetical protein LM5578 2066 | gi 284802310 ref YP003414175.1 | gi 662858600 ref NC_013766.2 :2056241-2056873  |
| hypothetical protein LM5578 2067 | gi 284802311 ref YP003414176.1 | gi 662858600 ref NC_013766.2 :2056995-2057612  |
| hypothetical protein LM5578 2068 | gi 284802312 ref YP003414177.1 | gi 662858600 ref NC_013766.2 :2057625-2058437  |
| hypothetical protein LM5578 2071 | gi 284802315 ref YP003414180.1 | gi 662858600 ref NC_013766.2 :c2062509-2061526 |
| hypothetical protein LM5578 2072 | gi 284802316 ref YP003414181.1 | gi 662858600 ref NC_013766.2 :c2063226-2062603 |

|                                         |                                |                                                |
|-----------------------------------------|--------------------------------|------------------------------------------------|
| hypothetical protein LM5578 2073        | gi 284802317 ref YP003414182.1 | gi 662858600 ref NC_013766.2 :c2064877-2063366 |
| thymidylate synthase                    | gi 284802320 ref YP003414185.1 | gi 662858600 ref NC_013766.2 :c2067316-2066372 |
| hypothetical protein LM5578 2077        | gi 284802321 ref YP003414186.1 | gi 662858600 ref NC_013766.2 :c2069221-2067329 |
| hypothetical protein LM5578 2082        | gi 284802326 ref YP003414191.1 | gi 662858600 ref NC_013766.2 :c2073587-2072715 |
| hypothetical protein LM5578 2084        | gi 284802328 ref YP003414193.1 | gi 662858600 ref NC_013766.2 :c2075116-2074058 |
| hypothetical protein LM5578 2085        | gi 284802329 ref YP003414194.1 | gi 662858600 ref NC_013766.2 :c2076615-2075308 |
| xanthine phosphoribosyltransferase      | gi 284802330 ref YP003414195.1 | gi 662858600 ref NC_013766.2 :c2077200-2076622 |
| hypothetical protein LM5578 2088        | gi 284802332 ref YP003414197.1 | gi 662858600 ref NC_013766.2 :c2080104-2078956 |
| hypothetical protein LM5578 2090        | gi 284802334 ref YP003414199.1 | gi 662858600 ref NC_013766.2 :c2081703-2081158 |
| Holliday junction-specific endonuclease | gi 284802336 ref YP003414201.1 | gi 662858600 ref NC_013766.2 :2082312-2082917  |
| endonuclease III (DNA repair)           | gi 284802339 ref YP003414204.1 | gi 662858600 ref NC_013766.2 :c2086618-2085959 |
| hypothetical protein LM5578 2096        | gi 284802340 ref YP003414205.1 | gi 662858600 ref NC_013766.2 :c2087348-2086629 |
| asparaginyl-tRNA synthetase             | gi 284802341 ref YP003414206.1 | gi 662858600 ref NC_013766.2 :c2088789-2087497 |
| aspartate aminotransferase              | gi 284802342 ref YP003414207.1 | gi 662858600 ref NC_013766.2 :c2089984-2088803 |
| hypothetical protein LM5578 2099        | gi 284802343 ref YP003414208.1 | gi 662858600 ref NC_013766.2 :c2090591-2090007 |

|                                                                            |                                |                                                |
|----------------------------------------------------------------------------|--------------------------------|------------------------------------------------|
| bifunctional ATP-dependent DNA helicase/DNA polymerase III subunit epsilon | gi 284802344 ref YP003414209.1 | gi 662858600 ref NC_013766.2 :c2093422-2090636 |
| hypothetical protein LM5578 2102                                           | gi 284802346 ref YP003414211.1 | gi 662858600 ref NC_013766.2 :c2094763-2093906 |
| 3-methyl-2-oxobutanoate hydroxymethyltransferase                           | gi 284802347 ref YP003414212.1 | gi 662858600 ref NC_013766.2 :c2095600-2094767 |
| tRNA CCA-pyrophosphorylase                                                 | gi 284802350 ref YP003414215.1 | gi 662858600 ref NC_013766.2 :c2098536-2097355 |
| dihydrodipicolinate reductase                                              | gi 284802352 ref YP003414217.1 | gi 662858600 ref NC_013766.2 :c2099762-2098971 |
| hypothetical protein LM5578 2110                                           | gi 284802354 ref YP003414219.1 | gi 662858600 ref NC_013766.2 :2100234-2101100  |
| hypothetical protein LM5578 2111                                           | gi 284802355 ref YP003414220.1 | gi 662858600 ref NC_013766.2 :c2102196-2101090 |
| hypothetical protein LM5578 2112                                           | gi 284802356 ref YP003414221.1 | gi 662858600 ref NC_013766.2 :2102516-2103652  |
| hypothetical protein LM5578 2113                                           | gi 284802357 ref YP003414222.1 | gi 662858600 ref NC_013766.2 :2103678-2104805  |
| malate dehydrogenase                                                       | gi 284802360 ref YP003414225.1 | gi 662858600 ref NC_013766.2 :2106619-2108262  |
| hypothetical protein LM5578 2117                                           | gi 284802361 ref YP003414226.1 | gi 662858600 ref NC_013766.2 :2108265-2109272  |
| hypothetical protein LM5578 2119                                           | gi 284802363 ref YP003414228.1 | gi 662858600 ref NC_013766.2 :c2113097-2111832 |
| hypothetical protein LM5578 2120                                           | gi 284802364 ref YP003414229.1 | gi 662858600 ref NC_013766.2 :c2113894-2113211 |
| hypothetical protein LM5578 2121                                           | gi 284802365 ref YP003414230.1 | gi 662858600 ref NC_013766.2 :c2114576-2113980 |

|                                                       |                                |                                                |
|-------------------------------------------------------|--------------------------------|------------------------------------------------|
| hypothetical protein LM5578 2122                      | gi 284802366 ref YP003414231.1 | gi 662858600 ref NC_013766.2 :c2115209-2114664 |
| hypothetical protein LM5578 2123                      | gi 284802367 ref YP003414232.1 | gi 662858600 ref NC_013766.2 :c2116497-2115244 |
| prephenate dehydrogenase                              | gi 284802369 ref YP003414234.1 | gi 662858600 ref NC_013766.2 :c2119031-2117928 |
| histidinol-phosphate aminotransferase                 | gi 284802370 ref YP003414235.1 | gi 662858600 ref NC_013766.2 :c2120134-2119052 |
| chorismate synthase                                   | gi 284802373 ref YP003414238.1 | gi 662858600 ref NC_013766.2 :c2122771-2121605 |
| ubiquinone/menaquinone biosynthesis methyltransferase | gi 284802376 ref YP003414241.1 | gi 662858600 ref NC_013766.2 :c2125126-2124413 |
| hypothetical protein LM5578 2133                      | gi 284802377 ref YP003414242.1 | gi 662858600 ref NC_013766.2 :c2125916-2125149 |
| GTP cyclohydrolase I                                  | gi 284802378 ref YP003414243.1 | gi 662858600 ref NC_013766.2 :c2126544-2125975 |
| hypothetical protein LM5578 2136                      | gi 284802380 ref YP003414245.1 | gi 662858600 ref NC_013766.2 :c2128447-2127467 |
| GTP-binding protein EngA                              | gi 284802382 ref YP003414247.1 | gi 662858600 ref NC_013766.2 :c2130899-2129589 |
| 30S ribosomal protein S1                              | gi 284802383 ref YP003414248.1 | gi 662858600 ref NC_013766.2 :c2132188-2131043 |
| hypothetical protein LM5578 2140                      | gi 284802384 ref YP003414249.1 | gi 662858600 ref NC_013766.2 :c2133221-2132547 |
| hypothetical protein LM5578 2141                      | gi 284802385 ref YP003414250.1 | gi 662858600 ref NC_013766.2 :c2134199-2133237 |
| hypothetical protein LM5578 2148                      | gi 284802392 ref YP003414257.1 | gi 662858600 ref NC_013766.2 :c2141523-2139733 |
| hypothetical protein LM5578 2149                      | gi 284802393 ref YP003414258.1 | gi 662858600 ref NC_013766.2 :c2142340-2141624 |



|                                        |                                |                                                |
|----------------------------------------|--------------------------------|------------------------------------------------|
| hypothetical protein LM5578 2150       | gi 284802394 ref YP003414259.1 | gi 662858600 ref NC_013766.2 :c2143257-2142523 |
| hypothetical protein LM5578 2151       | gi 284802395 ref YP003414260.1 | gi 662858600 ref NC_013766.2 :c2143856-2143260 |
| segregation and condensation protein A | gi 284802396 ref YP003414261.1 | gi 662858600 ref NC_013766.2 :c2144602-2143853 |
| purine nucleoside phosphorylase        | gi 284802398 ref YP003414263.1 | gi 662858600 ref NC_013766.2 :c2146927-2146109 |
| phosphopentomutase                     | gi 284802399 ref YP003414264.1 | gi 662858600 ref NC_013766.2 :c2148130-2146946 |
| hypothetical protein LM5578 2156       | gi 284802400 ref YP003414265.1 | gi 662858600 ref NC_013766.2 :c2149052-2148159 |
| hypothetical protein LM5578 2157       | gi 284802401 ref YP003414266.1 | gi 662858600 ref NC_013766.2 :c2149759-2149205 |
| hypothetical protein LM5578 2160       | gi 284802404 ref YP003414269.1 | gi 662858600 ref NC_013766.2 :c2152989-2152048 |
| hypothetical protein LM5578 2161       | gi 284802405 ref YP003414270.1 | gi 662858600 ref NC_013766.2 :2153154-2153978  |
| hypothetical protein LM5578 2163       | gi 284802407 ref YP003414272.1 | gi 662858600 ref NC_013766.2 :c2155602-2154982 |
| hypothetical protein LM5578 2164       | gi 284802408 ref YP003414273.1 | gi 662858600 ref NC_013766.2 :c2156417-2155602 |
| hypothetical protein LM5578 2166       | gi 284802410 ref YP003414275.1 | gi 662858600 ref NC_013766.2 :c2158459-2157902 |
| hypothetical protein LM5578 2167       | gi 284802411 ref YP003414276.1 | gi 662858600 ref NC_013766.2 :2158735-2159394  |
| hypothetical protein LM5578 2176       | gi 284802420 ref YP003414285.1 | gi 662858600 ref NC_013766.2 :c2166974-2165904 |
| hypothetical protein LM5578 2178       | gi 284802422 ref YP003414287.1 | gi 662858600 ref NC_013766.2 :c2168799-2167879 |

|                                         |                                |                                                |
|-----------------------------------------|--------------------------------|------------------------------------------------|
| 2-isopropylmalate synthase              | gi 284802433 ref YP003414298.1 | gi 662858600 ref NC_013766.2 :2178130-2179668  |
| 3-isopropylmalate dehydrogenase         | gi 284802434 ref YP003414299.1 | gi 662858600 ref NC_013766.2 :2179670-2180722  |
| isopropylmalate isomerase large subunit | gi 284802435 ref YP003414300.1 | gi 662858600 ref NC_013766.2 :2180724-2182112  |
| isopropylmalate isomerase small subunit | gi 284802436 ref YP003414301.1 | gi 662858600 ref NC_013766.2 :2182099-2182680  |
| hypothetical protein LM5578 2200        | gi 284802444 ref YP003414309.1 | gi 662858600 ref NC_013766.2 :c2190644-2189649 |
| hypothetical protein LM5578 2202        | gi 284802446 ref YP003414311.1 | gi 662858600 ref NC_013766.2 :c2192565-2191744 |
| hypothetical protein LM5578 2203        | gi 284802447 ref YP003414312.1 | gi 662858600 ref NC_013766.2 :c2193364-2192546 |
| hypothetical protein LM5578 2205        | gi 284802449 ref YP003414314.1 | gi 662858600 ref NC_013766.2 :c2194575-2193874 |
| acetolactate synthase                   | gi 284802452 ref YP003414317.1 | gi 662858600 ref NC_013766.2 :c2198290-2196593 |
| hypothetical protein LM5578 2209        | gi 284802453 ref YP003414318.1 | gi 662858600 ref NC_013766.2 :c2199943-2198486 |
| hypothetical protein LM5578 2210        | gi 284802454 ref YP003414319.1 | gi 662858600 ref NC_013766.2 :c2200935-2199964 |
| hypothetical protein LM5578 2211        | gi 284802455 ref YP003414320.1 | gi 662858600 ref NC_013766.2 :c2201883-2200954 |
| hypothetical protein LM5578 2213        | gi 284802457 ref YP003414322.1 | gi 662858600 ref NC_013766.2 :c2205213-2203480 |
| hypothetical protein LM5578 2214        | gi 284802458 ref YP003414323.1 | gi 662858600 ref NC_013766.2 :c2205887-2205276 |
| hypothetical protein LM5578 2215        | gi 284802459 ref YP003414324.1 | gi 662858600 ref NC_013766.2 :c2207252-2205948 |

|                                                      |                                |                                                |
|------------------------------------------------------|--------------------------------|------------------------------------------------|
| hypothetical protein LM5578 2219                     | gi 284802463 ref YP003414328.1 | gi 662858600 ref NC_013766.2 :c2214520-2213825 |
| hypothetical protein LM5578 2222                     | gi 284802466 ref YP003414331.1 | gi 662858600 ref NC_013766.2 :c2219210-2218683 |
| hypothetical protein LM5578 2223                     | gi 284802467 ref YP003414332.1 | gi 662858600 ref NC_013766.2 :c2219825-2219304 |
| hypothetical protein LM5578 2234                     | gi 284802478 ref YP003414343.1 | gi 662858600 ref NC_013766.2 :c2229565-2228876 |
| cell division protein FtsZ                           | gi 284802479 ref YP003414344.1 | gi 662858600 ref NC_013766.2 :c2230859-2229684 |
| hypothetical protein LM5578 2236                     | gi 284802480 ref YP003414345.1 | gi 662858600 ref NC_013766.2 :c2232206-2230926 |
| UDP-N-acetylmuramoyl-L-alanyl-D-glutamate synthetase | gi 284802483 ref YP003414348.1 | gi 662858600 ref NC_013766.2 :c2235862-2234495 |
| hypothetical protein LM5578 2240                     | gi 284802484 ref YP003414349.1 | gi 662858600 ref NC_013766.2 :c2236977-2236003 |
| hypothetical protein LM5578 2242                     | gi 284802486 ref YP003414351.1 | gi 662858600 ref NC_013766.2 :c2240890-2238674 |
| S-adenosyl-methyltransferase MraW                    | gi 284802488 ref YP003414353.1 | gi 662858600 ref NC_013766.2 :c2242243-2241305 |
| hypothetical protein LM5578 2249                     | gi 284802493 ref YP003414358.1 | gi 662858600 ref NC_013766.2 :c2248219-2247683 |
| hypothetical protein LM5578 2251                     | gi 284802495 ref YP003414360.1 | gi 662858600 ref NC_013766.2 :2249603-2251843  |
| hypothetical protein LM5578 2257                     | gi 284802501 ref YP003414366.1 | gi 662858600 ref NC_013766.2 :c2255936-2254893 |
| protoheme IX farnesyltransferase                     | gi 284802502 ref YP003414367.1 | gi 662858600 ref NC_013766.2 :c2257000-2256095 |
| hypothetical protein LM5578 2260                     | gi 284802504 ref YP003414369.1 | gi 662858600 ref NC_013766.2 :2258262-2259005  |

|                                   |                                |                                                |
|-----------------------------------|--------------------------------|------------------------------------------------|
| hypothetical protein LM5578 2261  | gi 284802505 ref YP003414370.1 | gi 662858600 ref NC_013766.2 :c2259652-2259011 |
| hypothetical protein LM5578 2262  | gi 284802506 ref YP003414371.1 | gi 662858600 ref NC_013766.2 :c2260288-2259671 |
| hypothetical protein LM5578 2263  | gi 284802507 ref YP003414372.1 | gi 662858600 ref NC_013766.2 :c2261925-2260300 |
| chaperonin GroEL                  | gi 284802513 ref YP003414378.1 | gi 662858600 ref NC_013766.2 :c2266503-2264875 |
| hypothetical protein LM5578 2272  | gi 284802516 ref YP003414381.1 | gi 662858600 ref NC_013766.2 :2267059-2267745  |
| hypothetical protein LM5578 2275  | gi 284802519 ref YP003414384.1 | gi 662858600 ref NC_013766.2 :2268935-2270887  |
| hypothetical protein LM5578 2276  | gi 284802520 ref YP003414385.1 | gi 662858600 ref NC_013766.2 :2270911-2271870  |
| O-sialoglycoprotein endopeptidase | gi 284802521 ref YP003414386.1 | gi 662858600 ref NC_013766.2 :c2273436-2272414 |
| hypothetical protein LM5578 2279  | gi 284802523 ref YP003414388.1 | gi 662858600 ref NC_013766.2 :c2274577-2273885 |
| hypothetical protein LM5578 2281  | gi 284802525 ref YP003414390.1 | gi 662858600 ref NC_013766.2 :c2276282-2275140 |
| hypothetical protein LM5578 2289  | gi 284802533 ref YP003414398.1 | gi 662858600 ref NC_013766.2 :c2284532-2283201 |
| argininosuccinate lyase           | gi 284802537 ref YP003414402.1 | gi 662858600 ref NC_013766.2 :2287719-2289089  |
| glycine betaine transporter BetL  | gi 284802538 ref YP003414403.1 | gi 662858600 ref NC_013766.2 :2289257-2290780  |
| hypothetical protein LM5578 2297  | gi 284802541 ref YP003414406.1 | gi 662858600 ref NC_013766.2 :c2292609-2291677 |
| hypothetical protein LM5578 2301  | gi 284802545 ref YP003414410.1 | gi 662858600 ref NC_013766.2 :c2296766-2294760 |

|                                  |                                |                                                |
|----------------------------------|--------------------------------|------------------------------------------------|
| hypothetical protein LM5578 2307 | gi 284802551 ref YP003414416.1 | gi 662858600 ref NC_013766.2 :2301533-2303527  |
| hypothetical protein LM5578 2311 | gi 284802555 ref YP003414420.1 | gi 662858600 ref NC_013766.2 :2305619-2306752  |
| hypothetical protein LM5578 2312 | gi 284802556 ref YP003414421.1 | gi 662858600 ref NC_013766.2 :2306794-2307591  |
| putative heme peroxidase         | gi 284802560 ref YP003414425.1 | gi 662858600 ref NC_013766.2 :2309882-2310637  |
| hypothetical protein LM5578 2320 | gi 284802564 ref YP003414429.1 | gi 662858600 ref NC_013766.2 :2314451-2314912  |
| hypothetical protein LM5578 2321 | gi 284802565 ref YP003414430.1 | gi 662858600 ref NC_013766.2 :c2316299-2314947 |
| hypothetical protein LM5578 2322 | gi 284802566 ref YP003414431.1 | gi 662858600 ref NC_013766.2 :c2317910-2316549 |
| hypothetical protein LM5578 2323 | gi 284802567 ref YP003414432.1 | gi 662858600 ref NC_013766.2 :c2318728-2317907 |
| hypothetical protein LM5578 2326 | gi 284802570 ref YP003414435.1 | gi 662858600 ref NC_013766.2 :c2322892-2322041 |
| hypothetical protein LM5578 2328 | gi 284802572 ref YP003414437.1 | gi 662858600 ref NC_013766.2 :c2325546-2324287 |
| hypothetical protein LM5578 2329 | gi 284802573 ref YP003414438.1 | gi 662858600 ref NC_013766.2 :c2327535-2325760 |
| hypothetical protein LM5578 2334 | gi 284802578 ref YP003414443.1 | gi 662858600 ref NC_013766.2 :c2333928-2333239 |
| hypothetical protein LM5578 2342 | gi 284802586 ref YP003414451.1 | gi 662858600 ref NC_013766.2 :2340507-2341409  |
| hypothetical protein LM5578 2343 | gi 284802587 ref YP003414452.1 | gi 662858600 ref NC_013766.2 :2341417-2342637  |
| hypothetical protein LM5578 2345 | gi 284802589 ref YP003414454.1 | gi 662858600 ref NC_013766.2 :c2344380-2343715 |

|                                                    |                                |                                                |
|----------------------------------------------------|--------------------------------|------------------------------------------------|
| hypothetical protein LM5578 2346                   | gi 284802590 ref YP003414455.1 | gi 662858600 ref NC_013766.2 :2344594-2346336  |
| hypothetical protein LM5578 2347                   | gi 284802591 ref YP003414456.1 | gi 662858600 ref NC_013766.2 :c2347109-2346375 |
| hypothetical protein LM5578 2348                   | gi 284802592 ref YP003414457.1 | gi 662858600 ref NC_013766.2 :c2348240-2347224 |
| hypothetical protein LM5578 2349                   | gi 284802593 ref YP003414458.1 | gi 662858600 ref NC_013766.2 :c2349163-2348309 |
| hypothetical protein LM5578 2350                   | gi 284802594 ref YP003414459.1 | gi 662858600 ref NC_013766.2 :2349269-2350276  |
| ribonucleotide-diphosphate reductase subunit beta  | gi 284802601 ref YP003414466.1 | gi 662858600 ref NC_013766.2 :c2353967-2352918 |
| ribonucleotide-diphosphate reductase subunit alpha | gi 284802602 ref YP003414467.1 | gi 662858600 ref NC_013766.2 :c2356314-2354023 |
| hypothetical protein LM5578 2367                   | gi 284802611 ref YP003414476.1 | gi 662858600 ref NC_013766.2 :c2365108-2364230 |
| hypothetical protein LM5578 2368                   | gi 284802612 ref YP003414477.1 | gi 662858600 ref NC_013766.2 :c2365873-2365178 |
| hypothetical protein LM5578 2369                   | gi 284802613 ref YP003414478.1 | gi 662858600 ref NC_013766.2 :c2366797-2366126 |
| hypothetical protein LM5578 2370                   | gi 284802614 ref YP003414479.1 | gi 662858600 ref NC_013766.2 :c2367480-2366863 |
| hypothetical protein LM5578 2374                   | gi 284802618 ref YP003414483.1 | gi 662858600 ref NC_013766.2 :c2370404-2369181 |
| hypothetical protein LM5578 2376                   | gi 284802620 ref YP003414485.1 | gi 662858600 ref NC_013766.2 :c2373581-2372214 |
| hypothetical protein LM5578 2377                   | gi 284802621 ref YP003414486.1 | gi 662858600 ref NC_013766.2 :c2374760-2373687 |
| hypothetical protein LM5578 2384                   | gi 284802628 ref YP003414493.1 | gi 662858600 ref NC_013766.2 :c2386860-2386120 |

|                                  |                                |                                                |
|----------------------------------|--------------------------------|------------------------------------------------|
| hypothetical protein LM5578 2385 | gi 284802629 ref YP003414494.1 | gi 662858600 ref NC_013766.2 :c2387643-2386864 |
| hypothetical protein LM5578 2386 | gi 284802630 ref YP003414495.1 | gi 662858600 ref NC_013766.2 :c2388613-2387624 |
| hypothetical protein LM5578 2387 | gi 284802631 ref YP003414496.1 | gi 662858600 ref NC_013766.2 :c2389475-2388603 |
| hypothetical protein LM5578 2388 | gi 284802632 ref YP003414497.1 | gi 662858600 ref NC_013766.2 :c2391271-2389562 |
| hypothetical protein LM5578 2389 | gi 284802633 ref YP003414498.1 | gi 662858600 ref NC_013766.2 :c2391909-2391286 |
| hypothetical protein LM5578 2391 | gi 284802635 ref YP003414500.1 | gi 662858600 ref NC_013766.2 :c2394484-2392679 |
| hypothetical protein LM5578 2392 | gi 284802636 ref YP003414501.1 | gi 662858600 ref NC_013766.2 :c2395672-2394557 |
| adaptor protein                  | gi 284802637 ref YP003414502.1 | gi 662858600 ref NC_013766.2 :c2396451-2395798 |
| hypothetical protein LM5578 2396 | gi 284802640 ref YP003414505.1 | gi 662858600 ref NC_013766.2 :c2399438-2398362 |
| hypothetical protein LM5578 2397 | gi 284802641 ref YP003414506.1 | gi 662858600 ref NC_013766.2 :c2400490-2399456 |
| hypothetical protein LM5578 2398 | gi 284802642 ref YP003414507.1 | gi 662858600 ref NC_013766.2 :c2401419-2400490 |
| hypothetical protein LM5578 2399 | gi 284802643 ref YP003414508.1 | gi 662858600 ref NC_013766.2 :c2403374-2401698 |
| tryptophanyl-tRNA synthetase     | gi 284802645 ref YP003414510.1 | gi 662858600 ref NC_013766.2 :2404676-2405671  |
| hypothetical protein LM5578 2406 | gi 284802650 ref YP003414515.1 | gi 662858600 ref NC_013766.2 :c2410332-2409205 |
| hypothetical protein LM5578 2408 | gi 284802652 ref YP003414517.1 | gi 662858600 ref NC_013766.2 :c2411622-2410933 |

|                                  |                                |                                                |
|----------------------------------|--------------------------------|------------------------------------------------|
| hypothetical protein LM5578 2409 | gi 284802653 ref YP003414518.1 | gi 662858600 ref NC_013766.2 :c2414313-2411713 |
| hypothetical protein LM5578 2410 | gi 284802654 ref YP003414519.1 | gi 662858600 ref NC_013766.2 :c2415139-2414462 |
| hypothetical protein LM5578 2411 | gi 284802655 ref YP003414520.1 | gi 662858600 ref NC_013766.2 :c2416021-2415251 |
| hypothetical protein LM5578 2412 | gi 284802656 ref YP003414521.1 | gi 662858600 ref NC_013766.2 :c2416870-2416085 |
| ferrochelatase                   | gi 284802658 ref YP003414523.1 | gi 662858600 ref NC_013766.2 :c2418421-2417492 |
| uroporphyrinogen decarboxylase   | gi 284802659 ref YP003414524.1 | gi 662858600 ref NC_013766.2 :c2419479-2418418 |
| hypothetical protein LM5578 2416 | gi 284802660 ref YP003414525.1 | gi 662858600 ref NC_013766.2 :2419607-2420179  |
| hypothetical protein LM5578 2417 | gi 284802661 ref YP003414526.1 | gi 662858600 ref NC_013766.2 :c2421441-2420218 |
| hypothetical protein LM5578 2421 | gi 284802665 ref YP003414530.1 | gi 662858600 ref NC_013766.2 :2423335-2423874  |
| 3'-5' exoribonuclease YhaM       | gi 284802667 ref YP003414532.1 | gi 662858600 ref NC_013766.2 :c2425899-2424913 |
| hypothetical protein LM5578 2424 | gi 284802668 ref YP003414533.1 | gi 662858600 ref NC_013766.2 :c2428622-2425899 |
| hypothetical protein LM5578 2425 | gi 284802669 ref YP003414534.1 | gi 662858600 ref NC_013766.2 :c2429854-2428619 |
| fumarate hydratase               | gi 284802672 ref YP003414537.1 | gi 662858600 ref NC_013766.2 :c2433036-2431669 |
| hypothetical protein LM5578 2430 | gi 284802674 ref YP003414539.1 | gi 662858600 ref NC_013766.2 :c2434802-2433897 |
| hypothetical protein LM5578 2434 | gi 284802678 ref YP003414543.1 | gi 662858600 ref NC_013766.2 :2438064-2438933  |



|                                  |                                |                                                |
|----------------------------------|--------------------------------|------------------------------------------------|
| hypothetical protein LM5578 2435 | gi 284802679 ref YP003414544.1 | gi 662858600 ref NC_013766.2 :2439189-2440493  |
| hypothetical protein LM5578 2436 | gi 284802680 ref YP003414545.1 | gi 662858600 ref NC_013766.2 :c2441411-2440533 |
| hypothetical protein LM5578 2437 | gi 284802681 ref YP003414546.1 | gi 662858600 ref NC_013766.2 :2441712-2442566  |
| shikimate 5-dehydrogenase        | gi 284802683 ref YP003414548.1 | gi 662858600 ref NC_013766.2 :2444618-2445487  |
| hypothetical protein LM5578 2441 | gi 284802685 ref YP003414550.1 | gi 662858600 ref NC_013766.2 :2446888-2448078  |
| hypothetical protein LM5578 2446 | gi 284802690 ref YP003414555.1 | gi 662858600 ref NC_013766.2 :2451160-2451726  |
| hypothetical protein LM5578 2447 | gi 284802691 ref YP003414556.1 | gi 662858600 ref NC_013766.2 :2451737-2452612  |
| hypothetical protein LM5578 2449 | gi 284802693 ref YP003414558.1 | gi 662858600 ref NC_013766.2 :c2453675-2453019 |
| hypothetical protein LM5578 2450 | gi 284802694 ref YP003414559.1 | gi 662858600 ref NC_013766.2 :c2454556-2453672 |
| hypothetical protein LM5578 2451 | gi 284802695 ref YP003414560.1 | gi 662858600 ref NC_013766.2 :2454943-2455563  |
| hypothetical protein LM5578 2452 | gi 284802696 ref YP003414561.1 | gi 662858600 ref NC_013766.2 :2455577-2456575  |
| hypothetical protein LM5578 2456 | gi 284802700 ref YP003414565.1 | gi 662858600 ref NC_013766.2 :c2460842-2460213 |
| hypothetical protein LM5578 2457 | gi 284802701 ref YP003414566.1 | gi 662858600 ref NC_013766.2 :2461015-2462307  |
| hypothetical protein LM5578 2462 | gi 284802706 ref YP003414571.1 | gi 662858600 ref NC_013766.2 :c2465308-2464433 |
| hypothetical protein LM5578 2464 | gi 284802708 ref YP003414573.1 | gi 662858600 ref NC_013766.2 :c2466513-2465761 |

|                                  |                                |                                                |
|----------------------------------|--------------------------------|------------------------------------------------|
| hypothetical protein LM5578 2465 | gi 284802709 ref YP003414574.1 | gi 662858600 ref NC_013766.2 :2466665-2467477  |
| hypothetical protein LM5578 2466 | gi 284802710 ref YP003414575.1 | gi 662858600 ref NC_013766.2 :c2468457-2467555 |
| hypothetical protein LM5578 2468 | gi 284802712 ref YP003414577.1 | gi 662858600 ref NC_013766.2 :c2469772-2468924 |
| hypothetical protein LM5578 2469 | gi 284802713 ref YP003414578.1 | gi 662858600 ref NC_013766.2 :c2473480-2469773 |
| hypothetical protein LM5578 2470 | gi 284802714 ref YP003414579.1 | gi 662858600 ref NC_013766.2 :c2476973-2473482 |
| hypothetical protein LM5578 2533 | gi 284802776 ref YP003414641.1 | gi 662858600 ref NC_013766.2 :c2520168-2518270 |
| fructose-1-phosphate kinase      | gi 284802777 ref YP003414642.1 | gi 662858600 ref NC_013766.2 :c2521093-2520170 |
| hypothetical protein LM5578 2535 | gi 284802778 ref YP003414643.1 | gi 662858600 ref NC_013766.2 :c2521842-2521090 |
| hypothetical protein LM5578 2539 | gi 284802782 ref YP003414647.1 | gi 662858600 ref NC_013766.2 :c2525922-2524804 |
| hypothetical protein LM5578 2543 | gi 284802786 ref YP003414651.1 | gi 662858600 ref NC_013766.2 :c2529403-2528408 |
| hypothetical protein LM5578 2545 | gi 284802788 ref YP003414653.1 | gi 662858600 ref NC_013766.2 :c2530886-2530176 |
| hypothetical protein LM5578 2547 | gi 284802790 ref YP003414655.1 | gi 662858600 ref NC_013766.2 :c2532444-2531635 |
| hypothetical protein LM5578 2548 | gi 284802791 ref YP003414656.1 | gi 662858600 ref NC_013766.2 :c2532996-2532460 |
| hypothetical protein LM5578 2549 | gi 284802792 ref YP003414657.1 | gi 662858600 ref NC_013766.2 :c2533557-2533012 |
| hypothetical protein LM5578 2551 | gi 284802794 ref YP003414659.1 | gi 662858600 ref NC_013766.2 :c2536679-2534727 |

|                                                                |                                |                                                |
|----------------------------------------------------------------|--------------------------------|------------------------------------------------|
| hypothetical protein LM5578 2553                               | gi 284802796 ref YP003414661.1 | gi 662858600 ref NC_013766.2 :c2539646-2538405 |
| hypothetical protein LM5578 2555                               | gi 284802798 ref YP003414663.1 | gi 662858600 ref NC_013766.2 :c2540458-2539847 |
| hypothetical protein LM5578 2556                               | gi 284802799 ref YP003414664.1 | gi 662858600 ref NC_013766.2 :c2541178-2540648 |
| hypothetical protein LM5578 2557                               | gi 284802800 ref YP003414665.1 | gi 662858600 ref NC_013766.2 :c2541926-2541195 |
| hypothetical protein LM5578 2558                               | gi 284802801 ref YP003414666.1 | gi 662858600 ref NC_013766.2 :c2542815-2541970 |
| hypothetical protein LM5578 2565                               | gi 284802808 ref YP003414673.1 | gi 662858600 ref NC_013766.2 :c2559051-2558293 |
| glucose-6-phosphate isomerase                                  | gi 284802809 ref YP003414674.1 | gi 662858600 ref NC_013766.2 :c2560508-2559156 |
| hypothetical protein LM5578 2569                               | gi 284802812 ref YP003414677.1 | gi 662858600 ref NC_013766.2 :2561672-2562838  |
| hypothetical protein LM5578 2570                               | gi 284802813 ref YP003414678.1 | gi 662858600 ref NC_013766.2 :2562977-2564080  |
| hypothetical protein LM5578 2571                               | gi 284802814 ref YP003414679.1 | gi 662858600 ref NC_013766.2 :2564080-2564760  |
| aspartate kinase                                               | gi 284802816 ref YP003414681.1 | gi 662858600 ref NC_013766.2 :2565362-2566723  |
| hypothetical protein LM5578 2575                               | gi 284802818 ref YP003414683.1 | gi 662858600 ref NC_013766.2 :c2567831-2567247 |
| putative monovalent cation/H <sup>+</sup> antiporter subunit D | gi 284802823 ref YP003414688.1 | gi 662858600 ref NC_013766.2 :2572774-2574261  |
| putative monovalent cation/H <sup>+</sup> antiporter subunit G | gi 284802826 ref YP003414691.1 | gi 662858600 ref NC_013766.2 :2575015-2575608  |
| hypothetical protein LM5578 2586                               | gi 284802829 ref YP003414694.1 | gi 662858600 ref NC_013766.2 :2576692-2577954  |

|                                  |                                |                                                |
|----------------------------------|--------------------------------|------------------------------------------------|
| hypothetical protein LM5578 2588 | gi 284802831 ref YP003414696.1 | gi 662858600 ref NC_013766.2 :c2580105-2578894 |
| hypothetical protein LM5578 2589 | gi 284802832 ref YP003414697.1 | gi 662858600 ref NC_013766.2 :2580555-2581550  |
| hypothetical protein LM5578 2590 | gi 284802833 ref YP003414698.1 | gi 662858600 ref NC_013766.2 :2581638-2582267  |
| hypothetical protein LM5578 2598 | gi 284802841 ref YP003414706.1 | gi 662858600 ref NC_013766.2 :c2589141-2587831 |
| hypothetical protein LM5578 2600 | gi 284802843 ref YP003414708.1 | gi 662858600 ref NC_013766.2 :c2590436-2589669 |
| hypothetical protein LM5578 2602 | gi 284802845 ref YP003414710.1 | gi 662858600 ref NC_013766.2 :c2592116-2590728 |
| hypothetical protein LM5578 2605 | gi 284802848 ref YP003414713.1 | gi 662858600 ref NC_013766.2 :c2594333-2593491 |
| hypothetical protein LM5578 2610 | gi 284802853 ref YP003414718.1 | gi 662858600 ref NC_013766.2 :c2599897-2599112 |
| hypothetical protein LM5578 2611 | gi 284802854 ref YP003414719.1 | gi 662858600 ref NC_013766.2 :2600237-2601313  |
| hypothetical protein LM5578 2612 | gi 284802855 ref YP003414720.1 | gi 662858600 ref NC_013766.2 :c2602185-2601355 |
| hypothetical protein LM5578 2613 | gi 284802856 ref YP003414721.1 | gi 662858600 ref NC_013766.2 :c2602923-2602249 |
| hypothetical protein LM5578 2618 | gi 284802861 ref YP003414726.1 | gi 662858600 ref NC_013766.2 :c2607303-2606428 |
| hypothetical protein LM5578 2625 | gi 284802868 ref YP003414733.1 | gi 662858600 ref NC_013766.2 :c2613153-2612143 |
| hypothetical protein LM5578 2626 | gi 284802869 ref YP003414734.1 | gi 662858600 ref NC_013766.2 :c2614124-2613153 |
| hypothetical protein LM5578 2636 | gi 284802879 ref YP003414744.1 | gi 662858600 ref NC_013766.2 :c2621175-2620279 |

|                                                |                                |                                                |
|------------------------------------------------|--------------------------------|------------------------------------------------|
| hypothetical protein LM5578 2641               | gi 284802884 ref YP003414749.1 | gi 662858600 ref NC_013766.2 :c2628225-2627281 |
| hypothetical protein LM5578 2646               | gi 284802889 ref YP003414754.1 | gi 662858600 ref NC_013766.2 :c2636549-2635803 |
| hypothetical protein LM5578 2648               | gi 284802891 ref YP003414756.1 | gi 662858600 ref NC_013766.2 :c2637884-2637141 |
| hypothetical protein LM5578 2649               | gi 284802892 ref YP003414757.1 | gi 662858600 ref NC_013766.2 :c2638786-2638067 |
| hypothetical protein LM5578 2652               | gi 284802895 ref YP003414760.1 | gi 662858600 ref NC_013766.2 :c2642912-2642157 |
| phosphoglycerate kinase                        | gi 284802896 ref YP003414761.1 | gi 662858600 ref NC_013766.2 :c2644148-2642958 |
| glyceraldehyde-3-phosphate dehydrogenase       | gi 284802897 ref YP003414762.1 | gi 662858600 ref NC_013766.2 :c2645293-2644283 |
| hypothetical protein LM5578 2655               | gi 284802898 ref YP003414763.1 | gi 662858600 ref NC_013766.2 :c2646373-2645327 |
| hypothetical protein LM5578 2657               | gi 284802900 ref YP003414765.1 | gi 662858600 ref NC_013766.2 :c2649244-2648318 |
| hypothetical protein LM5578 2659               | gi 284802902 ref YP003414767.1 | gi 662858600 ref NC_013766.2 :c2652175-2651564 |
| hypothetical protein LM5578 2662               | gi 284802905 ref YP003414770.1 | gi 662858600 ref NC_013766.2 :c2654830-2653397 |
| ATP-dependent Clp protease proteolytic subunit | gi 284802906 ref YP003414771.1 | gi 662858600 ref NC_013766.2 :2654987-2655583  |
| hypothetical protein LM5578 2667               | gi 284802910 ref YP003414775.1 | gi 662858600 ref NC_013766.2 :c2660471-2659500 |
| hypothetical protein LM5578 2668               | gi 284802911 ref YP003414776.1 | gi 662858600 ref NC_013766.2 :c2661447-2660479 |
| hypothetical protein LM5578 2669               | gi 284802912 ref YP003414777.1 | gi 662858600 ref NC_013766.2 :c2662345-2661449 |

|                                           |                                |                                                |
|-------------------------------------------|--------------------------------|------------------------------------------------|
| hypothetical protein LM5578 2671          | gi 284802914 ref YP003414779.1 | gi 662858600 ref NC_013766.2 :c2665265-2664204 |
| UDP-glucose 4-epimerase                   | gi 284802915 ref YP003414780.1 | gi 662858600 ref NC_013766.2 :c2666265-2665282 |
| thioredoxin reductase                     | gi 284802916 ref YP003414781.1 | gi 662858600 ref NC_013766.2 :c2667343-2666384 |
| hypothetical protein LM5578 2674          | gi 284802917 ref YP003414782.1 | gi 662858600 ref NC_013766.2 :c2668915-2667422 |
| pyrophosphatase PpaX                      | gi 284802919 ref YP003414784.1 | gi 662858600 ref NC_013766.2 :c2670137-2669484 |
| prolipoprotein diacylglyceryl transferase | gi 284802920 ref YP003414785.1 | gi 662858600 ref NC_013766.2 :c2671014-2670181 |
| HPr kinase/phosphorylase                  | gi 284802921 ref YP003414786.1 | gi 662858600 ref NC_013766.2 :c2672038-2671100 |
| hypothetical protein LM5578 2681          | gi 284802924 ref YP003414789.1 | gi 662858600 ref NC_013766.2 :c2674022-2672811 |
| excinuclease ABC (subunit A)              | gi 284802926 ref YP003414791.1 | gi 662858600 ref NC_013766.2 :c2678431-2675561 |
| excinuclease ABC subunit B                | gi 284802927 ref YP003414792.1 | gi 662858600 ref NC_013766.2 :c2680415-2678439 |
| hypothetical protein LM5578 2686          | gi 284802929 ref YP003414794.1 | gi 662858600 ref NC_013766.2 :c2681573-2680926 |
| hypothetical protein LM5578 2689          | gi 284802932 ref YP003414797.1 | gi 662858600 ref NC_013766.2 :c2683319-2682660 |
| hypothetical protein LM5578 2690          | gi 284802933 ref YP003414798.1 | gi 662858600 ref NC_013766.2 :c2684111-2683332 |
| hypothetical protein LM5578 2693          | gi 284802936 ref YP003414801.1 | gi 662858600 ref NC_013766.2 :c2686800-2685850 |
| hypothetical protein LM5578 2694          | gi 284802937 ref YP003414802.1 | gi 662858600 ref NC_013766.2 :c2687775-2686867 |

|                                            |                                |                                                |
|--------------------------------------------|--------------------------------|------------------------------------------------|
| two-component sensor histidine kinase      | gi 284802938 ref YP003414803.1 | gi 662858600 ref NC_013766.2 :c2689806-2688031 |
| two-component response phosphate regulator | gi 284802939 ref YP003414804.1 | gi 662858600 ref NC_013766.2 :c2690516-2689806 |
| hypothetical protein LM5578 2697           | gi 284802940 ref YP003414805.1 | gi 662858600 ref NC_013766.2 :c2691784-2690666 |
| hypothetical protein LM5578 2698           | gi 284802941 ref YP003414806.1 | gi 662858600 ref NC_013766.2 :c2693317-2691869 |
| hypothetical protein LM5578 2701           | gi 284802944 ref YP003414809.1 | gi 662858600 ref NC_013766.2 :c2697035-2696151 |
| hypothetical protein LM5578 2702           | gi 284802945 ref YP003414810.1 | gi 662858600 ref NC_013766.2 :c2697711-2697025 |
| hypothetical protein LM5578 2703           | gi 284802946 ref YP003414811.1 | gi 662858600 ref NC_013766.2 :c2699078-2698215 |
| hypothetical protein LM5578 2706           | gi 284802949 ref YP003414814.1 | gi 662858600 ref NC_013766.2 :c2703577-2703014 |
| hypothetical protein LM5578 2707           | gi 284802950 ref YP003414815.1 | gi 662858600 ref NC_013766.2 :c2704428-2703772 |
| hypothetical protein LM5578 2708           | gi 284802951 ref YP003414816.1 | gi 662858600 ref NC_013766.2 :c2705740-2704421 |
| hypothetical protein LM5578 2709           | gi 284802952 ref YP003414817.1 | gi 662858600 ref NC_013766.2 :c2706786-2705935 |
| hypothetical protein LM5578 2710           | gi 284802953 ref YP003414818.1 | gi 662858600 ref NC_013766.2 :c2707493-2706807 |
| hypothetical protein LM5578 2713           | gi 284802956 ref YP003414821.1 | gi 662858600 ref NC_013766.2 :2709236-2710294  |
| hypothetical protein LM5578 2714           | gi 284802957 ref YP003414822.1 | gi 662858600 ref NC_013766.2 :c2711385-2710333 |
| hypothetical protein LM5578 2720           | gi 284802963 ref YP003414828.1 | gi 662858600 ref NC_013766.2 :c2716670-2715675 |

|                                                   |                                |                                                |
|---------------------------------------------------|--------------------------------|------------------------------------------------|
| UDP-N-acetylglucosamine 1-carboxyvinyltransferase | gi 284802964 ref YP003414829.1 | gi 662858600 ref NC_013766.2 :c2718125-2716833 |
| hypothetical protein LM5578 2737                  | gi 284802980 ref YP003414845.1 | gi 662858600 ref NC_013766.2 :c2732399-2731548 |
| threonine synthase                                | gi 284802984 ref YP003414849.1 | gi 662858600 ref NC_013766.2 :c2736093-2735038 |
| homoserine dehydrogenase                          | gi 284802985 ref YP003414850.1 | gi 662858600 ref NC_013766.2 :c2737382-2736096 |
| UDP-N-acetylglucosamine 1-carboxyvinyltransferase | gi 284802990 ref YP003414855.1 | gi 662858600 ref NC_013766.2 :c2742058-2740787 |
| hypothetical protein LM5578 2749                  | gi 284802992 ref YP003414857.1 | gi 662858600 ref NC_013766.2 :c2744266-2743256 |
| hypothetical protein LM5578 2750                  | gi 284802993 ref YP003414858.1 | gi 662858600 ref NC_013766.2 :c2745557-2744274 |
| hypothetical protein LM5578 2751                  | gi 284802994 ref YP003414859.1 | gi 662858600 ref NC_013766.2 :c2746732-2745878 |
| putative lipid kinase                             | gi 284802995 ref YP003414860.1 | gi 662858600 ref NC_013766.2 :c2747821-2746901 |
| CTP synthetase                                    | gi 284802997 ref YP003414862.1 | gi 662858600 ref NC_013766.2 :c2752533-2750935 |
| arginyl-tRNA synthetase                           | gi 284802999 ref YP003414864.1 | gi 662858600 ref NC_013766.2 :c2755473-2753803 |
| hypothetical protein LM5578 2758                  | gi 284803001 ref YP003414866.1 | gi 662858600 ref NC_013766.2 :c2756650-2755997 |
| hypothetical protein LM5578 2760                  | gi 284803003 ref YP003414868.1 | gi 662858600 ref NC_013766.2 :c2758267-2756945 |
| hypothetical protein LM5578 2766                  | gi 284803009 ref YP003414874.1 | gi 662858600 ref NC_013766.2 :c2762547-2761933 |
| hypothetical protein LM5578 2767                  | gi 284803010 ref YP003414875.1 | gi 662858600 ref NC_013766.2 :c2763203-2762571 |



|                                                      |                                |                                                |
|------------------------------------------------------|--------------------------------|------------------------------------------------|
| hypothetical protein LM5578 2769                     | gi 284803012 ref YP003414877.1 | gi 662858600 ref NC_013766.2 :c2764729-2763731 |
| hypothetical protein LM5578 2773                     | gi 284803016 ref YP003414881.1 | gi 662858600 ref NC_013766.2 :c2771824-2770997 |
| hypothetical protein LM5578 2779                     | gi 284803022 ref YP003414887.1 | gi 662858600 ref NC_013766.2 :c2776595-2775216 |
| hypothetical protein LM5578 2780                     | gi 284803023 ref YP003414888.1 | gi 662858600 ref NC_013766.2 :c2777269-2776592 |
| formate dehydrogenase accessory protein              | gi 284803024 ref YP003414889.1 | gi 662858600 ref NC_013766.2 :c2778101-2777316 |
| hypothetical protein LM5578 2786                     | gi 284803029 ref YP003414894.1 | gi 662858600 ref NC_013766.2 :c2785484-2784597 |
| lysyl-tRNA synthetase                                | gi 284803032 ref YP003414897.1 | gi 662858600 ref NC_013766.2 :c2794202-2792706 |
| hypothetical protein LM5578 2790                     | gi 284803033 ref YP003414898.1 | gi 662858600 ref NC_013766.2 :c2795312-2794317 |
| hypothetical protein LM5578 2795                     | gi 284803038 ref YP003414903.1 | gi 662858600 ref NC_013766.2 :c2798682-2797756 |
| pantothenate kinase                                  | gi 284803040 ref YP003414905.1 | gi 662858600 ref NC_013766.2 :c2800477-2799698 |
| hypothetical protein LM5578 2799                     | gi 284803042 ref YP003414907.1 | gi 662858600 ref NC_013766.2 :c2804960-2803014 |
| peptidyl-tRNA hydrolase                              | gi 284803048 ref YP003414913.1 | gi 662858600 ref NC_013766.2 :c2812397-2811837 |
| hypothetical protein LM5578 2806                     | gi 284803049 ref YP003414914.1 | gi 662858600 ref NC_013766.2 :c2813088-2812504 |
| 50S ribosomal protein L25/general stress protein Ctc | gi 284803050 ref YP003414915.1 | gi 662858600 ref NC_013766.2 :c2813801-2813178 |
| L-lactate dehydrogenase                              | gi 284803051 ref YP003414916.1 | gi 662858600 ref NC_013766.2 :2814095-2815036  |

|                                                   |                                |                                                |
|---------------------------------------------------|--------------------------------|------------------------------------------------|
| hypothetical protein LM5578 2809                  | gi 284803052 ref YP003414917.1 | gi 662858600 ref NC_013766.2 :2815113-2815787  |
| phospholipase C                                   | gi 284803056 ref YP003414921.1 | gi 662858600 ref NC_013766.2 :c2818097-2817228 |
| Zinc metalloproteinase precursor                  | gi 284803058 ref YP003414923.1 | gi 662858600 ref NC_013766.2 :c2821783-2820251 |
| listeriolysin O precursor                         | gi 284803059 ref YP003414924.1 | gi 662858600 ref NC_013766.2 :c2823703-2822114 |
| phosphatidylinositol-specific phospholipase c     | gi 284803060 ref YP003414925.1 | gi 662858600 ref NC_013766.2 :2823945-2824898  |
| phosphoribosyl pyrophosphate synthetase           | gi 284803062 ref YP003414927.1 | gi 662858600 ref NC_013766.2 :c2826881-2825925 |
| hypothetical protein LM5578 2820                  | gi 284803063 ref YP003414928.1 | gi 662858600 ref NC_013766.2 :c2828305-2826932 |
| hypothetical protein LM5578 2825                  | gi 284803068 ref YP003414933.1 | gi 662858600 ref NC_013766.2 :c2832736-2832059 |
| purine operon repressor                           | gi 284803069 ref YP003414934.1 | gi 662858600 ref NC_013766.2 :c2833729-2832911 |
| hypothetical protein LM5578 2827                  | gi 284803070 ref YP003414935.1 | gi 662858600 ref NC_013766.2 :c2834630-2833893 |
| 4-diphosphocytidyl-2-C-methyl-D-erythritol kinase | gi 284803071 ref YP003414936.1 | gi 662858600 ref NC_013766.2 :c2835533-2834652 |
| dimethyladenosine transferase                     | gi 284803073 ref YP003414938.1 | gi 662858600 ref NC_013766.2 :c2836936-2836049 |
| hypothetical protein LM5578 2831                  | gi 284803074 ref YP003414939.1 | gi 662858600 ref NC_013766.2 :c2837504-2836929 |
| hypothetical protein LM5578 2832                  | gi 284803075 ref YP003414940.1 | gi 662858600 ref NC_013766.2 :c2838832-2837606 |
| hypothetical protein LM5578 2833                  | gi 284803076 ref YP003414941.1 | gi 662858600 ref NC_013766.2 :c2839897-2839124 |

|                                   |                                |                                                |
|-----------------------------------|--------------------------------|------------------------------------------------|
| hypothetical protein LM5578 2837  | gi 284803080 ref YP003414945.1 | gi 662858600 ref NC_013766.2 :c2848594-2847338 |
| hypothetical protein LM5578 2838  | gi 284803081 ref YP003414946.1 | gi 662858600 ref NC_013766.2 :c2849470-2848622 |
| hypothetical protein LM5578 2839  | gi 284803082 ref YP003414947.1 | gi 662858600 ref NC_013766.2 :c2850348-2849470 |
| hypothetical protein LM5578 2842  | gi 284803085 ref YP003414950.1 | gi 662858600 ref NC_013766.2 :c2854688-2853828 |
| hypothetical protein LM5578 2847  | gi 284803090 ref YP003414955.1 | gi 662858600 ref NC_013766.2 :c2861513-2860254 |
| hypothetical protein LM5578 2848  | gi 284803091 ref YP003414956.1 | gi 662858600 ref NC_013766.2 :c2862438-2861581 |
| hypothetical protein LM5578 2850  | gi 284803093 ref YP003414958.1 | gi 662858600 ref NC_013766.2 :c2863763-2862882 |
| hypothetical protein LM5578 2852  | gi 284803095 ref YP003414960.1 | gi 662858600 ref NC_013766.2 :c2864789-2864016 |
| hypothetical protein LM5578 2854  | gi 284803097 ref YP003414962.1 | gi 662858600 ref NC_013766.2 :c2866059-2865226 |
| DNA polymerase III subunit delta' | gi 284803098 ref YP003414963.1 | gi 662858600 ref NC_013766.2 :c2867033-2866065 |
| hypothetical protein LM5578 2856  | gi 284803099 ref YP003414964.1 | gi 662858600 ref NC_013766.2 :2867274-2868104  |
| hypothetical protein LM5578 2859  | gi 284803102 ref YP003414967.1 | gi 662858600 ref NC_013766.2 :c2873501-2872689 |
| hypothetical protein LM5578 2860  | gi 284803103 ref YP003414968.1 | gi 662858600 ref NC_013766.2 :c2875886-2873547 |
| hypothetical protein LM5578 2861  | gi 284803104 ref YP003414969.1 | gi 662858600 ref NC_013766.2 :2876166-2876846  |
| hypothetical protein LM5578 2907  | gi 284803150 ref YP003415015.1 | gi 662858600 ref NC_013766.2 :c2910406-2909708 |

|                                           |                                |                                                |
|-------------------------------------------|--------------------------------|------------------------------------------------|
| hypothetical protein LM5578 2908          | gi 284803151 ref YP003415016.1 | gi 662858600 ref NC_013766.2 :c2911637-2910522 |
| hypothetical protein LM5578 2910          | gi 284803153 ref YP003415018.1 | gi 662858600 ref NC_013766.2 :2912649-2914391  |
| hypothetical protein LM5578 2913          | gi 284803156 ref YP003415021.1 | gi 662858600 ref NC_013766.2 :c2919477-2917195 |
| hypothetical protein LM5578 2915          | gi 284803158 ref YP003415023.1 | gi 662858600 ref NC_013766.2 :c2920857-2920225 |
| hypothetical protein LM5578 2920          | gi 284803163 ref YP003415028.1 | gi 662858600 ref NC_013766.2 :c2923531-2922620 |
| hypothetical protein LM5578 2921          | gi 284803164 ref YP003415029.1 | gi 662858600 ref NC_013766.2 :c2924359-2923553 |
| hypothetical protein LM5578 2922          | gi 284803165 ref YP003415030.1 | gi 662858600 ref NC_013766.2 :c2925348-2924383 |
| FOF1 ATP synthase subunit beta            | gi 284803169 ref YP003415034.1 | gi 662858600 ref NC_013766.2 :c2928710-2927340 |
| FOF1 ATP synthase subunit alpha           | gi 284803171 ref YP003415036.1 | gi 662858600 ref NC_013766.2 :c2931073-2929577 |
| hypothetical protein LM5578 2964          | gi 284803207 ref YP003415072.1 | gi 662858600 ref NC_013766.2 :c2973678-2971705 |
| putative accessory gene regulator protein | gi 284803211 ref YP003415076.1 | gi 662858600 ref NC_013766.2 :c2976742-2976128 |
| hypothetical protein LM5578 2969          | gi 284803212 ref YP003415077.1 | gi 662858600 ref NC_013766.2 :c2977610-2976999 |
| arginine deiminase                        | gi 284803216 ref YP003415081.1 | gi 662858600 ref NC_013766.2 :c2980437-2979211 |
| hypothetical protein LM5578 2974          | gi 284803217 ref YP003415082.1 | gi 662858600 ref NC_013766.2 :c2981182-2980523 |
| hypothetical protein LM5578 2982          | gi 284803225 ref YP003415090.1 | gi 662858600 ref NC_013766.2 :c2990492-2989134 |

|                                     |                                |                                                |
|-------------------------------------|--------------------------------|------------------------------------------------|
| hypothetical protein LM5578 2983    | gi 284803226 ref YP003415091.1 | gi 662858600 ref NC_013766.2 :c2992907-2990505 |
| hypothetical protein LM5578 2984    | gi 284803227 ref YP003415092.1 | gi 662858600 ref NC_013766.2 :c2993869-2992904 |
| LacI family transcription regulator | gi 284803228 ref YP003415093.1 | gi 662858600 ref NC_013766.2 :2994071-2995126  |
| hypothetical protein LM5578 2994    | gi 284803237 ref YP003415102.1 | gi 662858600 ref NC_013766.2 :c3001539-3000664 |
| hypothetical protein LM5578 2996    | gi 284803239 ref YP003415104.1 | gi 662858600 ref NC_013766.2 :c3004374-3003730 |
| hypothetical protein LM5578 2997    | gi 284803240 ref YP003415105.1 | gi 662858600 ref NC_013766.2 :c3005130-3004426 |
| hypothetical protein LM5578 2998    | gi 284803241 ref YP003415106.1 | gi 662858600 ref NC_013766.2 :c3005979-3005158 |
| hypothetical protein LM5578 2999    | gi 284803242 ref YP003415107.1 | gi 662858600 ref NC_013766.2 :c3006763-3005960 |
| hypothetical protein LM5578 3002    | gi 284803245 ref YP003415110.1 | gi 662858600 ref NC_013766.2 :c3008431-3007691 |
| hypothetical protein LM5578 3003    | gi 284803246 ref YP003415111.1 | gi 662858600 ref NC_013766.2 :3008672-3009493  |
| AA3-600 quinol oxidase subunit I    | gi 284803251 ref YP003415116.1 | gi 662858600 ref NC_013766.2 :c3015281-3013302 |
| hypothetical protein LM5578 3010    | gi 284803253 ref YP003415118.1 | gi 662858600 ref NC_013766.2 :c3017833-3016751 |
| hypothetical protein LM5578 3012    | gi 284803255 ref YP003415120.1 | gi 662858600 ref NC_013766.2 :c3019680-3018739 |
| DNA gyrase subunit A                | gi 284803259 ref YP003415124.1 | gi 662858600 ref NC_013766.2 :c3024560-3022032 |
| DNA gyrase subunit B                | gi 284803260 ref YP003415125.1 | gi 662858600 ref NC_013766.2 :c3026595-3024655 |

|                                            |                                |                                                |
|--------------------------------------------|--------------------------------|------------------------------------------------|
| recombination protein F                    | gi 284803261 ref YP003415126.1 | gi 662858600 ref NC_013766.2 :c3027756-3026644 |
| hypothetical protein LM5578 3020           | gi 284803263 ref YP003415128.1 | gi 662858600 ref NC_013766.2 :c3029504-3028161 |
| DNA polymerase III subunit beta            | gi 284803264 ref YP003415129.1 | gi 662858600 ref NC_013766.2 :c3030758-3029613 |
| chromosomal replication initiation protein | gi 284803265 ref YP003415130.1 | gi 662858600 ref NC_013766.2 :c3032307-3030952 |
