# Supplementary material for: The Listeria monocytogenes Core-Genome Sequence Typer (LmCGST): a bioinformatic pipeline for molecular characterization with next-generation sequence data
Source: PubMed Central journal article supplement (PMC4618880; doi:10.1186/s12866-015-0526-1), 2015-10-22

**Supporting Information for:**

The *Listeria monocytogenes* Core-Genome Sequence Typer (LmCGST): a bioinformatic pipeline for molecular characterization with next-generation sequence data

Arthur W. Pightling<sup>1</sup>, Nicholas Petronella<sup>2</sup>, Franco Pagotto<sup>1\*</sup>

<sup>1</sup> Listeriosis Reference Service for Canada, Microbiology Research Division, Bureau of Microbial Hazards, Food Directorate, Health Products and Food Branch, Health Canada, 251 Sir Frederick Banting Driveway, Ottawa, Ontario, K1A 0K9 Canada

<sup>2</sup> Biostatistics and Modelling Division, Bureau of Food Surveillance and Science Integration, Food Directorate, Health Products and Food Branch, Health Canada, 251 Sir Frederick Banting Driveway, Ottawa, Ontario, K1A 0K9 Canada

\* Corresponding author

E-mails:

Franco Pagotto: Franco.Pagotto@hc-sc.gc.ca

Arthur Pightling: Arthur.Pightling@hc-sc.gc.ca

Nicholas Petronella: Nicholas.Petronella@hc-sc.gc.ca

**Additional file 15: Diagram of adjusted Wallace coefficients calculated from pulsed-field gel electrophoresis (PFGE), ribotyping, and core-genome sequence typing (CGST) data.** ApaI and AscI data were combined to generate the PFGE category and ApaI, AscI, and ribotype data were combined to generate the PFGE+Ribo category.

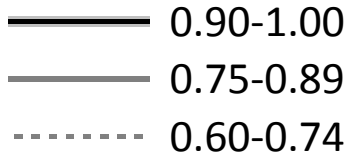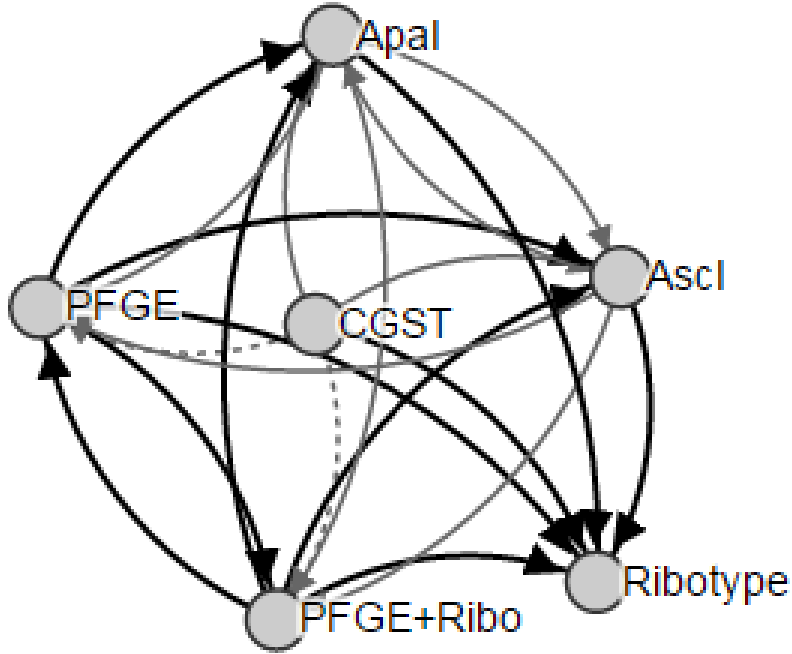

Supplement: 12866_2015_526_MOESM15_ESM.pdf [file 12866_2015_526_MOESM15_ESM.pdf]
