# Supplementary material for: The Listeria monocytogenes Core-Genome Sequence Typer (LmCGST): a bioinformatic pipeline for molecular characterization with next-generation sequence data
Source: PubMed Central journal article supplement (PMC4618880; doi:10.1186/s12866-015-0526-1), 2015-10-22
Supplement: 12866_2015_526_MOESM18_ESM.pdf [file 12866_2015_526_MOESM18_ESM.pdf]

**Supporting Information for:**

The *Listeria monocytogenes* Core-Genome Sequence Typer (LmCGST): a bioinformatic pipeline for molecular characterization with next-generation sequence data

Arthur W. Pightling<sup>1</sup>, Nicholas Petronella<sup>2</sup>, Franco Pagotto<sup>1\*</sup>

<sup>1</sup> Listeriosis Reference Service for Canada, Microbiology Research Division, Bureau of Microbial Hazards, Food Directorate, Health Products and Food Branch, Health Canada, 251 Sir Frederick Banting Driveway, Ottawa, Ontario, K1A 0K9 Canada

<sup>2</sup> Biostatistics and Modelling Division, Bureau of Food Surveillance and Science Integration, Food Directorate, Health Products and Food Branch, Health Canada, 251 Sir Frederick Banting Driveway, Ottawa, Ontario, K1A 0K9 Canada

\* Corresponding author

E-mails:

Franco Pagotto: [Franco.Pagotto@hc-sc.gc.ca](mailto:Franco.Pagotto@hc-sc.gc.ca)

Arthur Pightling: [Arthur.Pightling@hc-sc.gc.ca](mailto:Arthur.Pightling@hc-sc.gc.ca)

Nicholas Petronella: [Nicholas.Petronella@hc-sc.gc.ca](mailto:Nicholas.Petronella@hc-sc.gc.ca)

**Additional file 18: Data used to calculate unique *Listeria monocytogenes* high-confidence core genomes.**

| <b>Strain</b> | <b>NCBI Database</b> | <b>NCBI Number</b>                        |
|---------------|----------------------|-------------------------------------------|
| CC70B         | Short-read archive   | SRR835447                                 |
| J1776         | Nucleotide           | CP006598.1                                |
| Scott-A       | Nucleotide           | NZ_CM001159.1                             |
| R2-502        | Nucleotide           | CP006594.1                                |
| J2-064        | Nucleotide           | CP006592.1                                |
| Lm19860       | Nucleotide           | KK211032.1                                |
| Lm26686       | Nucleotide           | KK211038.1                                |
| F6900         | Nucleotide           | NZ_AARU02000001.1 –<br>NZ_AARU020000023.1 |
| J2818         | Nucleotide           | NZ_AARX02000001.1 –<br>NZ_AARX020000024.1 |
| Lm25180       | Nucleotide           | KK211191.1                                |
| Lm21045       | Nucleotide           | KK211193.1                                |
| WSLC1001      | Nucleotide           | CP007160.1                                |
| C1-387        | Nucleotide           | CP006591.1                                |
| NCCP_15743    | Nucleotide           | NZ_APJT01000001.1 –<br>NZ_APJT01000005.1  |
| HPB1013       | Short-read archive   | SRR1639783                                |
| HPB1014       | Short-read archive   | SRR1640020                                |
| HPB1015       | Short-read archive   | SRR1640113                                |
| HPB1022       | Short-read archive   | SRR1640203                                |
| HPB1027       | Short-read archive   | SRR1640093                                |
| HPB1031       | Short-read archive   | SRR1640143                                |
| HPB1042       | Short-read archive   | SRR1639796                                |
| HPB1045       | Short-read archive   | SRR1640206                                |
| HPB1074       | Short-read archive   | SRR1639771                                |
| HPB1075       | Short-read archive   | SRR1640205                                |
| HPB1077       | Short-read archive   | SRR1640000                                |
| HPB1092       | Short-read archive   | SRR1640007                                |
| HPB1102       | Short-read archive   | SRR1639767                                |
| HPB1111       | Short-read archive   | SRR1640136                                |
| HPB1174       | Short-read archive   | SRR1639774                                |
| HPB1175       | Short-read archive   | SRR1639778                                |
| HPB1225       | Short-read archive   | SRR1640172                                |
| HPB1340       | Short-read archive   | SRR1640144                                |

|         |                    |                |
|---------|--------------------|----------------|
| HPB1341 | Short-read archive | SRR1640146     |
| HPB1631 | Short-read archive | SRR1640221     |
| HPB1654 | Short-read archive | SRR1640175     |
| HPB1679 | Short-read archive | SRR1639790     |
| HPB1707 | Short-read archive | SRR1640208     |
| HPB1945 | Short-read archive | SRR1640116     |
| HPB2    | Short-read archive | SRR1640183     |
| HPB2088 | Nucleotide         | JOKU00000000.1 |
| HPB2129 | Short-read archive | SRR1640122     |
| HPB2130 | Short-read archive | SRR1640129     |
| HPB2134 | Short-read archive | SRR1640130     |
| HPB2141 | Short-read archive | SRR1640003     |
| HPB2166 | Short-read archive | SRR1640184     |
| HPB2263 | Short-read archive | SRR1640039     |
| HPB2264 | Short-read archive | SRR1640043     |
| HPB23   | Short-read archive | SRR1639677     |
| HPB2386 | Short-read archive | SRR1640193     |
| HPB2412 | Short-read archive | SRR1640211     |
| HPB285  | Short-read archive | SRR1640177     |
| HPB2864 | Short-read archive | SRR1640182     |
| HPB2865 | Short-read archive | SRR1640187     |
| HPB2866 | Short-read archive | SRR1640188     |
| HPB2921 | Short-read archive | SRR1640173     |
| HPB2980 | Short-read archive | SRR1640195     |
| HPB330  | Short-read archive | SRR1640223     |
| HPB37   | Short-read archive | SRR1639999     |
| HPB394  | Short-read archive | SRR1640131     |
| HPB396  | Short-read archive | SRR1639755     |
| HPB4    | Short-read archive | SRR1640179     |
| HPB424  | Short-read archive | SRR1640213     |
| HPB518  | Short-read archive | SRR1640164     |
| HPB5209 | Short-read archive | SRR1640224     |
| HPB5252 | Short-read archive | SRR1640125     |
| HPB535  | Short-read archive | SRR1640222     |
| HPB5415 | Nucleotide         | JOKV00000000.1 |
| HPB5767 | Short-read archive | SRR1640123     |
| HPB6355 | Short-read archive | SRR1640120     |
| HPB7    | Short-read archive | SRR1639760     |

| HPB7171 [58] | Nucleotide         | JMMW01000000.1 |
|--------------|--------------------|----------------|
| HPB769       | Short-read archive | SRR1640108     |
| HPB770       | Short-read archive | SRR1640109     |
| HPB771       | Short-read archive | SRR1640069     |
| HPB772       | Short-read archive | SRR1640111     |
| HPB773       | Short-read archive | SRR1640089     |
| HPB774       | Short-read archive | SRR1640090     |
| HPB8         | Short-read archive | SRR1639674     |
| HPB862       | Short-read archive | SRR1639793     |
| HPB9         | Short-read archive | SRR1639763     |
| HPB913       | Short-read archive | SRR1640166     |
| HPB960       | Short-read archive | SRR1640119     |
| HPB962       | Short-read archive | SRR1639780     |
| HPB963       | Short-read archive | SRR1639787     |
| HPB976       | Short-read archive | SRR1640169     |
| HPB1024*     | Short-read archive | SRR1640197     |
| HPB1035*     | Short-read archive | SRR1640198     |
| HPB1043*     | Short-read archive | SRR1640199     |
| HPB1050*     | Short-read archive | SRR1640115     |
| HPB1053*     | Short-read archive | SRR1639663     |
| HPB1104*     | Short-read archive | SRR1640024     |
| HPB1110*     | Short-read archive | SRR1640201     |
| HPB1342*     | Short-read archive | SRR1640152     |
| HPB1380*     | Short-read archive | SRR1640162     |
| HPB2131*     | Short-read archive | SRR1686399     |
| HPB22*       | Short-read archive | SRR1639669     |
| HPB2863*     | Short-read archive | SRR1640181     |
| HPB5622*     | Short-read archive | SRR1373535     |

Note: Asterisks indicate taxa with high-confidence core (HCC) profiles that exactly match a profile in the HCC database.
